# Supplementary material
Source: MDPI journal article supplement (https://www.mdpi.com/1424-2818/12/2/85)
Supplement: s1 [file s1]

**Table S1:** List of species including voucher's specimen number, species name, locality information, and GenBank accession number

| Family             | Species                      | Voucher Specimen Number | Locality                                     | Latitude | Longitude | GenBank Accession Number |
|--------------------|------------------------------|-------------------------|----------------------------------------------|----------|-----------|--------------------------|
| <b>Brahmaeidae</b> |                              |                         |                                              |          |           |                          |
|                    | <i>Dactyloceras lucina</i> 1 | MTCR057                 | Nigeria; CRNP; Oban Division: Nsan community | 5.30123  | 8.346     | MN883729                 |
|                    | <i>D. lucina</i> 2           | MTCR058                 | Nigeria; CRNP; Oban Division: Nsan community | 5.30123  | 8.346     | MN883730                 |
|                    | <i>D. lucina</i> 3           | MTCR059                 | Nigeria; CRNP; Oban Division: Nsan community | 5.34231  | 8.3481    | MN883731                 |
|                    | <i>D. lucina</i> 4           | MTCR060                 | Nigeria; CRNP; Oban Division: Nsan community | 5.34762  | 8.34901   | MN883732                 |
| <b>Crambidae</b>   |                              |                         |                                              |          |           |                          |
|                    | <i>Cadarena sinuata</i> 1    | MTCR065                 | Nigeria; CRNP; Oban Division: Nsan community | 5.38097  | 8.37354   | MN883737                 |
|                    | <i>C. sinuata</i> 2          | MTCR066                 | Nigeria; CRNP; Oban Division: Nsan community | 5.38097  | 8.37354   | MN883738                 |
|                    | <i>C. sinuata</i> 3          | MTCR067                 | Nigeria; CRNP; Oban Division: Nsan community | 5.40245  | 8.39875   | MN883739                 |
|                    | <i>C. sinuata</i> 4          | MTCR068                 | Nigeria; CRNP; Oban Division: Nsan community | 5.40245  | 8.39875   | MN883740                 |
|                    | <i>Palpita</i> sp 1          | MTCR105                 | Nigeria; CRNP; Oban Division: Nsan community | 5.40245  | 8.39875   | MN883777                 |
|                    | <i>Palpita</i> sp 2          | MTCR106                 | Nigeria; CRNP; Oban Division: Nsan community | 5.46842  | 8.42654   | MN883778                 |
|                    | <i>Palpita</i> sp 3          | MTCR107                 | Nigeria; CRNP; Oban Division: Nsan community | 5.51325  | 8.42765   | MN883779                 |
|                    | <i>Palpita</i> sp 4          | MTCR108                 | Nigeria; CRNP; Oban Division: Nsan community | 5.52346  | 8.45437   | MN883780                 |

|                        |         |                                              |         |         |          |
|------------------------|---------|----------------------------------------------|---------|---------|----------|
| <i>Palpita</i> sp 5    | MTCR117 | Nigeria; CRNP; Oban Division: Nsan community | 5.52346 | 8.45437 | MN883789 |
| <i>Palpita</i> sp 6    | MTCR118 | Nigeria; CRNP; Oban Division: Nsan community | 5.52346 | 8.45437 | MN883790 |
| <i>Palpita</i> sp 7    | MTCR119 | Nigeria; CRNP; Oban Division: Nsan community | 5.54109 | 8.46753 | MN883791 |
| <i>Palpita</i> sp 8    | MTCR120 | Nigeria; CRNP; Oban Division: Nsan community | 5.54109 | 8.46753 | MN883792 |
| <i>Palpita</i> sp 9    | MTCR121 | Nigeria; CRNP; Oban Division: Nsan community | 5.55687 | 8.48234 | MN883793 |
| <i>Palpita</i> sp 10   | MTCR122 | Nigeria; CRNP; Oban Division: Nsan community | 5.57234 | 8.48678 | MN883794 |
| <i>Palpita</i> sp 11   | MTCR123 | Nigeria; CRNP; Oban Division: Nsan community | 5.57234 | 8.48678 | MN883795 |
| <i>Palpita</i> sp 12   | MTCR124 | Nigeria; CRNP; Oban Division: Nsan community | 5.57234 | 8.48678 | MN883796 |
| <i>Palpita</i> sp 13   | MTCR141 | Nigeria; CRNP; Oban Division: Nsan community | 5.59265 | 8.49723 | MN883813 |
| <i>Palpita</i> sp 14   | MTCR142 | Nigeria; CRNP; Oban Division: Nsan community | 5.59265 | 8.50765 | MN883814 |
| <i>Palpita</i> sp 15   | MTCR143 | Nigeria; CRNP; Oban Division: Nsan community | 5.60423 | 8.58923 | MN883815 |
| <i>Palpita</i> sp 16   | MTCR144 | Nigeria; CRNP; Oban Division: Nsan community | 5.60865 | 8.59432 | MN883816 |
| <i>Hodebertia</i> sp 1 | MTCR113 | Nigeria; CRNP; Oban Division: Nsan community | 5.60865 | 8.59432 | MN883785 |
| <i>Hodebertia</i> sp 2 | MTCR114 | Nigeria; CRNP; Oban Division: Nsan community | 5.61285 | 8.59943 | MN883786 |
| <i>Hodebertia</i> sp 3 | MTCR115 | Nigeria; CRNP; Oban Division: Nsan community | 5.61285 | 8.59943 | MN883787 |
| <i>Hodebertia</i> sp 4 | MTCR116 | Nigeria; CRNP; Oban Division: Nsan community | 5.61285 | 8.59943 | MN883788 |

Erebidae

|                          |         |                                              |         |         |          |
|--------------------------|---------|----------------------------------------------|---------|---------|----------|
| <i>Arctia</i> sp 1       | MTCR037 | Nigeria; CRNP; Oban Division: Nsan community | 5.61766 | 8.60019 | MN883709 |
| <i>Arctia</i> sp 2       | MTCR038 | Nigeria; CRNP; Oban Division: Nsan community | 5.61986 | 8.60052 | MN883710 |
| <i>Arctia</i> sp 3       | MTCR039 | Nigeria; CRNP; Oban Division: Nsan community | 5.61986 | 8.60052 | MN883711 |
| <i>Arctia</i> sp 4       | MTCR040 | Nigeria; CRNP; Oban Division: Nsan community | 5.61986 | 8.60052 | MN883712 |
| <i>Arctia</i> sp 5       | MTCR073 | Nigeria; CRNP; Oban Division: Nsan community | 5.62054 | 8.60121 | MN883745 |
| <i>Arctia</i> sp 6       | MTCR074 | Nigeria; CRNP; Oban Division: Nsan community | 5.62054 | 8.60121 | MN883746 |
| <i>Arctia</i> sp 7       | MTCR075 | Nigeria; CRNP; Oban Division: Nsan community | 5.62065 | 8.60165 | MN883747 |
| <i>Arctia</i> sp 8       | MTCR076 | Nigeria; CRNP; Oban Division: Nsan community | 5.34762 | 8.34901 | MN883748 |
| <i>Euchromia lethe</i> 1 | MTCR001 | Nigeria; CRNP; Oban Division: Erokut Park    | 5.21243 | 8.26067 | MN883673 |
| <i>E. lethe</i> 2        | MTCR002 | Nigeria; CRNP; Oban Division: Erokut Park    | 5.21243 | 8.26067 | MN883674 |
| <i>E. lethe</i> 3        | MTCR003 | Nigeria; CRNP; Oban Division: Erokut Park    | 5.21243 | 8.26067 | MN883675 |
| <i>E. lethe</i> 4        | MTCR004 | Nigeria; CRNP; Oban Division: Erokut Park    | 5.21243 | 8.26067 | MN883676 |
| <i>E. lethe</i> 5        | MTCR005 | Nigeria; CRNP; Oban Division: Erokut Park    | 5.21376 | 8.26345 | MN883677 |
| <i>E. lethe</i> 6        | MTCR006 | Nigeria; CRNP; Oban Division: Erokut Park    | 5.21376 | 8.26345 | MN883678 |

|                    |         |                                              |         |         |          |
|--------------------|---------|----------------------------------------------|---------|---------|----------|
| <i>E. lethe</i> 7  | MTCR007 | Nigeria; CRNP; Oban Division: Erokut Park    | 5.21376 | 8.26345 | MN883679 |
| <i>E. lethe</i> 8  | MTCR008 | Nigeria; CRNP; Oban Division: Erokut Park    | 5.21376 | 8.26345 | MN883680 |
| <i>E. lethe</i> 9  | MTCR009 | Nigeria; CRNP; Oban Division: Erokut Park    | 5.21432 | 8.26541 | MN883681 |
| <i>E. lethe</i> 10 | MTCR010 | Nigeria; CRNP; Oban Division: Erokut Park    | 5.21432 | 8.26541 | MN883682 |
| <i>E. lethe</i> 11 | MTCR011 | Nigeria; CRNP; Oban Division: Erokut Park    | 5.21432 | 8.26541 | MN883683 |
| <i>E. lethe</i> 12 | MTCR012 | Nigeria; CRNP; Oban Division: Erokut Park    | 5.21432 | 8.26541 | MN883684 |
| <i>E. lethe</i> 13 | MTCR013 | Nigeria; CRNP; Oban Division: Erokut Park    | 5.21432 | 8.26541 | MN883685 |
| <i>E. lethe</i> 14 | MTCR014 | Nigeria; CRNP; Oban Division: Erokut Park    | 5.21564 | 8.26672 | MN883686 |
| <i>E. lethe</i> 15 | MTCR015 | Nigeria; CRNP; Oban Division: Erokut Park    | 5.21564 | 8.26672 | MN883687 |
| <i>E. lethe</i> 16 | MTCR016 | Nigeria; CRNP; Oban Division: Erokut Park    | 5.21564 | 8.26672 | MN883688 |
| <i>E. lethe</i> 17 | MTCR017 | Nigeria; CRNP; Oban Division: Erokut Park    | 5.21564 | 8.26672 | MN883689 |
| <i>E. lethe</i> 18 | MTCR018 | Nigeria; CRNP; Oban Division: Erokut Park    | 5.2189  | 8.2646  | MN883690 |
| <i>E. lethe</i> 19 | MTCR019 | Nigeria; CRNP; Oban Division: Erokut Park    | 5.2189  | 8.2646  | MN883691 |
| <i>E. lethe</i> 20 | MTCR020 | Nigeria; CRNP; Oban Division: Erokut Park    | 5.2189  | 8.2646  | MN883692 |
| <i>E. lethe</i> 21 | MTCR081 | Nigeria; CRNP; Oban Division: Nsan community | 5.61654 | 8.60013 | MN883753 |
| <i>E. lethe</i> 22 | MTCR082 | Nigeria; CRNP; Oban Division: Nsan community | 5.61766 | 8.60019 | MN883754 |

|                             |         |                                              |         |         |          |
|-----------------------------|---------|----------------------------------------------|---------|---------|----------|
| <i>E. lethe</i> 23          | MTCR083 | Nigeria; CRNP; Oban Division: Nsan community | 5.62065 | 8.60165 | MN883755 |
| <i>E. lethe</i> 24          | MTCR084 | Nigeria; CRNP; Oban Division: Nsan community | 5.62065 | 8.60165 | MN883756 |
| <i>E. lethe</i> 25          | MTCR085 | Nigeria; CRNP; Oban Division: Nsan community | 5.62088 | 8.60201 | MN883757 |
| <i>E. lethe</i> 26          | MTCR086 | Nigeria; CRNP; Oban Division: Nsan community | 5.62088 | 8.60201 | MN883758 |
| <i>E. lethe</i> 27          | MTCR087 | Nigeria; CRNP; Oban Division: Nsan community | 5.62088 | 8.60201 | MN883759 |
| <i>E. lethe</i> 28          | MTCR088 | Nigeria; CRNP; Oban Division: Nsan community | 5.62134 | 8.60254 | MN883760 |
| <i>E. lethe</i> 29          | MTCR097 | Nigeria; CRNP; Oban Division: Nsan community | 5.62134 | 8.60254 | MN883769 |
| <i>E. lethe</i> 30          | MTCR098 | Nigeria; CRNP; Oban Division: Nsan community | 5.62189 | 8.60276 | MN883770 |
| <i>E. lethe</i> 31          | MTCR099 | Nigeria; CRNP; Oban Division: Nsan community | 5.62203 | 8.60281 | MN883771 |
| <i>E. lethe</i> 32          | MTCR100 | Nigeria; CRNP; Oban Division: Nsan community | 5.62303 | 8.60314 | MN883772 |
| <i>Nyctemera leuconoe</i> 1 | MTCR021 | Nigeria; CRNP; Oban Division: Erokut Park    | 5.21564 | 8.26672 | MN883693 |
| <i>N. leuconoe</i> 2        | MTCR022 | Nigeria; CRNP; Oban Division: Erokut Park    | 5.21564 | 8.26672 | MN883694 |
| <i>N. leuconoe</i> 3        | MTCR023 | Nigeria; CRNP; Oban Division: Erokut Park    | 5.21564 | 8.26672 | MN883695 |
| <i>N. leuconoe</i> 4        | MTCR024 | Nigeria; CRNP; Oban Division: Erokut Park    | 5.21564 | 8.26672 | MN883696 |
| <i>N. leuconoe</i> 5        | MTCR109 | Nigeria; CRNP; Oban Division: Nsan community | 5.339   | 8.377   | MN883781 |
| <i>N. leuconoe</i> 6        | MTCR110 | Nigeria; CRNP; Oban Division: Nsan community | 5.339   | 8.377   | MN883782 |

|                              |         |                                              |         |         |          |
|------------------------------|---------|----------------------------------------------|---------|---------|----------|
| <i>N. leuconoe</i> 7         | MTCR111 | Nigeria; CRNP; Oban Division: Nsan community | 5.62763 | 8.62345 | MN883783 |
| <i>N. leuconoe</i> 8         | MTCR112 | Nigeria; CRNP; Oban Division: Nsan community | 5.62763 | 8.62345 | MN883784 |
| <i>N. leuconoe</i> 9         | MTCR137 | Nigeria; CRNP; Oban Division: Nsan community | 5.62763 | 8.62345 | MN883809 |
| <i>N. leuconoe</i> 10        | MTCR138 | Nigeria; CRNP; Oban Division: Nsan community | 5.62875 | 8.62765 | MN883810 |
| <i>N. leuconoe</i> 11        | MTCR139 | Nigeria; CRNP; Oban Division: Nsan community | 5.62875 | 8.62765 | MN883811 |
| <i>N. leuconoe</i> 12        | MTCR140 | Nigeria; CRNP; Oban Division: Nsan community | 5.63976 | 8.62954 | MN883812 |
| <i>Polydesma umbricola</i> 1 | MTCR029 | Nigeria; CRNP; Oban Division: Nsan community | 5.64001 | 8.62957 | MN883701 |
| <i>P. umbricola</i> 2        | MTCR030 | Nigeria; CRNP; Oban Division: Nsan community | 5.64254 | 8.63014 | MN883702 |
| <i>P. umbricola</i> 3        | MTCR031 | Nigeria; CRNP; Oban Division: Nsan community | 5.64254 | 8.63014 | MN883703 |
| <i>P. umbricola</i> 4        | MTCR032 | Nigeria; CRNP; Oban Division: Nsan community | 5.64254 | 8.63014 | MN883704 |
| <i>Otroeda</i> sp 1          | MTCR033 | Nigeria; CRNP; Oban Division: Nsan community | 5.64582 | 8.63467 | MN883705 |
| <i>Otroeda</i> sp 2          | MTCR034 | Nigeria; CRNP; Oban Division: Nsan community | 5.64799 | 8.63761 | MN883706 |
| <i>Otroeda</i> sp 3          | MTCR035 | Nigeria; CRNP; Oban Division: Nsan community | 5.64799 | 8.63761 | MN883707 |
| <i>Otroeda</i> sp 4          | MTCR036 | Nigeria; CRNP; Oban Division: Nsan community | 5.64799 | 8.63761 | MN883708 |
| <i>Otroeda</i> sp 5          | MTCR045 | Nigeria; CRNP; Oban Division: Nsan community | 5.64965 | 8.63974 | MN883717 |
| <i>Otroeda</i> sp 6          | MTCR046 | Nigeria; CRNP; Oban Division: Nsan community | 5.64993 | 8.63724 | MN883718 |

|                            |         |                                              |         |         |          |
|----------------------------|---------|----------------------------------------------|---------|---------|----------|
| <i>Otroeda</i> sp 7        | MTCR047 | Nigeria; CRNP; Oban Division: Nsan community | 5.64993 | 8.63724 | MN883719 |
| <i>Otroeda</i> sp 8        | MTCR048 | Nigeria; CRNP; Oban Division: Nsan community | 5.62065 | 8.60165 | MN883720 |
| <i>Otroeda</i> sp 9        | MTCR125 | Nigeria; CRNP; Oban Division: Nsan community | 5.64799 | 8.63761 | MN883797 |
| <i>Otroeda</i> sp 10       | MTCR126 | Nigeria; CRNP; Oban Division: Nsan community | 5.62088 | 8.60201 | MN883798 |
| <i>Otroeda</i> sp 11       | MTCR127 | Nigeria; CRNP; Oban Division: Nsan community | 5.62088 | 8.60201 | MN883799 |
| <i>Otroeda</i> sp 12       | MTCR128 | Nigeria; CRNP; Oban Division: Nsan community | 5.62763 | 8.62345 | MN883800 |
| <i>Otroeda</i> sp 13       | MTCR129 | Nigeria; CRNP; Oban Division: Nsan community | 5.62134 | 8.60254 | MN883801 |
| <i>Otroeda</i> sp 14       | MTCR130 | Nigeria; CRNP; Oban Division: Nsan community | 5.62189 | 8.60276 | MN883802 |
| <i>Otroeda</i> sp 15       | MTCR131 | Nigeria; CRNP; Oban Division: Nsan community | 5.62203 | 8.60281 | MN883803 |
| <i>Otroeda</i> sp 16       | MTCR132 | Nigeria; CRNP; Oban Division: Nsan community | 5.62763 | 8.62345 | MN883804 |
| <i>Deinypena</i> sp 1      | MTCR053 | Nigeria; CRNP; Oban Division: Nsan community | 5.62763 | 8.62345 | MN883725 |
| <i>Deinypena</i> sp 2      | MTCR054 | Nigeria; CRNP; Oban Division: Nsan community | 5.62303 | 8.60314 | MN883726 |
| <i>Deinypena</i> sp 3      | MTCR055 | Nigeria; CRNP; Oban Division: Nsan community | 5.62134 | 8.60254 | MN883727 |
| <i>Deinypena</i> sp 4      | MTCR056 | Nigeria; CRNP; Oban Division: Nsan community | 5.57234 | 8.48678 | MN883728 |
| <i>Deinypena lacista</i> 1 | MTCR069 | Nigeria; CRNP; Oban Division: Nsan community | 5.57234 | 8.48678 | MN883741 |
| <i>D. lacista</i> 2        | MTCR070 | Nigeria; CRNP; Oban Division: Nsan community | 5.62088 | 8.60201 | MN883742 |

|                       |         |                                              |         |         |          |
|-----------------------|---------|----------------------------------------------|---------|---------|----------|
| <i>D. lacista</i> 3   | MTCR071 | Nigeria; CRNP; Oban Division: Nsan community | 5.55687 | 8.48234 | MN883743 |
| <i>D. lacista</i> 4   | MTCR072 | Nigeria; CRNP; Oban Division: Nsan community | 5.57234 | 8.48678 | MN883744 |
| <i>D. lacista</i> 5   | MTCR077 | Nigeria; CRNP; Oban Division: Nsan community | 5.57234 | 8.48678 | MN883749 |
| <i>D. lacista</i> 6   | MTCR078 | Nigeria; CRNP; Oban Division: Nsan community | 5.57234 | 8.48678 | MN883750 |
| <i>D. lacista</i> 7   | MTCR079 | Nigeria; CRNP; Oban Division: Nsan community | 5.59265 | 8.49723 | MN883751 |
| <i>D. lacista</i> 8   | MTCR080 | Nigeria; CRNP; Oban Division: Nsan community | 5.40245 | 8.39875 | MN883752 |
| <i>D. lacista</i> 9   | MTCR145 | Nigeria; CRNP; Oban Division: Nsan community | 5.40245 | 8.39875 | MN883817 |
| <i>D. lacista</i> 10  | MTCR146 | Nigeria; CRNP; Oban Division: Nsan community | 5.51325 | 8.42765 | MN883818 |
| <i>D. lacista</i> 11  | MTCR147 | Nigeria; CRNP; Oban Division: Nsan community | 5.64799 | 8.63761 | MN883819 |
| <i>D. lacista</i> 12  | MTCR148 | Nigeria; CRNP; Oban Division: Nsan community | 5.38097 | 8.37354 | MN883820 |
| <i>D. lacista</i> 13  | MTCR149 | Nigeria; CRNP; Oban Division: Nsan community | 5.52346 | 8.45437 | MN883821 |
| <i>D. lacista</i> 14  | MTCR150 | Nigeria; CRNP; Oban Division: Nsan community | 5.52346 | 8.45437 | MN883822 |
| <i>D. lacista</i> 15  | MTCR151 | Nigeria; CRNP; Oban Division: Nsan community | 5.52346 | 8.45437 | MN883823 |
| <i>D. lacista</i> 16  | MTCR152 | Nigeria; CRNP; Oban Division: Nsan community | 5.339   | 8.377   | MN883824 |
| <i>Mocis mayeri</i> 1 | MTCR089 | Nigeria; CRNP; Oban Division: Nsan community | 5.339   | 8.377   | MN883761 |
| <i>M. mayeri</i> 2    | MTCR090 | Nigeria; CRNP; Oban Division: Nsan community | 5.339   | 8.377   | MN883762 |

|             |                                   |         |                                              |         |         |          |
|-------------|-----------------------------------|---------|----------------------------------------------|---------|---------|----------|
| Geometridae | <i>M. mayeri</i> 3                | MTCR091 | Nigeria; CRNP; Oban Division: Nsan community | 5.339   | 8.377   | MN883763 |
|             | <i>M. mayeri</i> 4                | MTCR092 | Nigeria; CRNP; Oban Division: Nsan community | 5.339   | 8.377   | MN883764 |
|             | <i>Scopula transsecta</i> 1       | MTCR025 | Nigeria; CRNP; Oban Division: Nsan community | 5.64799 | 8.63761 | MN883697 |
|             | <i>S. transsecta</i> 2            | MTCR026 | Nigeria; CRNP; Oban Division: Nsan community | 5.34762 | 8.34901 | MN883698 |
|             | <i>S. transsecta</i> 3            | MTCR027 | Nigeria; CRNP; Oban Division: Nsan community | 5.38097 | 8.37354 | MN883699 |
|             | <i>S. transsecta</i> 4            | MTCR028 | Nigeria; CRNP; Oban Division: Nsan community | 5.339   | 8.377   | MN883700 |
|             | <i>Amnemopsyche</i> sp 1          | MTCR133 | Nigeria; CRNP; Oban Division: Nsan community | 5.339   | 8.377   | MN883805 |
|             | <i>Amnemopsyche</i> sp 2          | MTCR134 | Nigeria; CRNP; Oban Division: Nsan community | 5.30123 | 8.346   | MN883806 |
|             | <i>Amnemopsyche</i> sp 3          | MTCR135 | Nigeria; CRNP; Oban Division: Nsan community | 5.30123 | 8.346   | MN883807 |
|             | <i>Amnemopsyche</i> sp 4          | MTCR136 | Nigeria; CRNP; Oban Division: Nsan community | 5.34231 | 8.3481  | MN883808 |
|             | <i>Archichlora viridimacula</i> 1 | MTCR049 | Nigeria; CRNP; Oban Division: Nsan community | 5.34762 | 8.34901 | MN883721 |
|             | <i>A. viridimacula</i> 2          | MTCR050 | Nigeria; CRNP; Oban Division: Nsan community | 5.34762 | 8.34901 | MN883722 |
|             | <i>A. viridimacula</i> 3          | MTCR051 | Nigeria; CRNP; Oban Division: Nsan community | 5.38097 | 8.37354 | MN883723 |
|             | <i>A. viridimacula</i> 4          | MTCR052 | Nigeria; CRNP; Oban Division: Nsan community | 5.38097 | 8.37354 | MN883724 |
|             | <i>Erastria albosignata</i> 1     | MTCR041 | Nigeria; CRNP; Oban Division: Nsan community | 5.40245 | 8.39875 | MN883713 |

|                         |         |                                              |         |         |          |
|-------------------------|---------|----------------------------------------------|---------|---------|----------|
| <i>E. albosignata</i> 2 | MTCR042 | Nigeria; CRNP; Oban Division: Nsan community | 5.40245 | 8.39875 | MN883714 |
| <i>E. albosignata</i> 3 | MTCR043 | Nigeria; CRNP; Oban Division: Nsan community | 5.40245 | 8.39875 | MN883715 |
| <i>E. albosignata</i> 4 | MTCR044 | Nigeria; CRNP; Oban Division: Nsan community | 5.46842 | 8.42654 | MN883716 |
| <i>E. albosignata</i> 5 | MTCR093 | Nigeria; CRNP; Oban Division: Nsan community | 5.51325 | 8.42765 | MN883765 |
| <i>E. albosignata</i> 6 | MTCR094 | Nigeria; CRNP; Oban Division: Nsan community | 5.38097 | 8.37354 | MN883766 |
| <i>E. albosignata</i> 7 | MTCR095 | Nigeria; CRNP; Oban Division: Nsan community | 5.38097 | 8.37354 | MN883767 |
| <i>E. albosignata</i> 8 | MTCR096 | Nigeria; CRNP; Oban Division: Nsan community | 5.38097 | 8.37354 | MN883768 |

Uraniidae

|                                  |         |                                              |         |         |          |
|----------------------------------|---------|----------------------------------------------|---------|---------|----------|
| <i>Acropteris costinigrata</i> 1 | MTCR101 | Nigeria; CRNP; Oban Division: Nsan community | 5.64799 | 8.63761 | MN883773 |
| <i>A. costinigrata</i> 2         | MTCR102 | Nigeria; CRNP; Oban Division: Nsan community | 5.38097 | 8.37354 | MN883774 |
| <i>A. costinigrata</i> 3         | MTCR103 | Nigeria; CRNP; Oban Division: Nsan community | 5.339   | 8.377   | MN883775 |
| <i>A. costinigrata</i> 4         | MTCR104 | Nigeria; CRNP; Oban Division: Nsan community | 5.339   | 8.377   | MN883776 |
| <i>Dissoprugna erycinaria</i> 1  | MTCR061 | Nigeria; CRNP; Oban Division: Nsan community | 5.339   | 8.377   | MN883733 |
| <i>D. erycinaria</i> 2           | MTCR062 | Nigeria; CRNP; Oban Division: Nsan community | 5.40245 | 8.39875 | MN883734 |
| <i>D. erycinaria</i> 3           | MTCR063 | Nigeria; CRNP; Oban Division: Nsan community | 5.40245 | 8.39875 | MN883735 |
| <i>D. erycinaria</i> 4           | MTCR064 | Nigeria; CRNP; Oban Division: Nsan community | 5.30123 | 8.346   | MN883736 |

---

Note: CRNP = Cross River National Park
