# Supplementary material
Source: MDPI journal article supplement (https://www.mdpi.com/1424-2818/12/2/85)

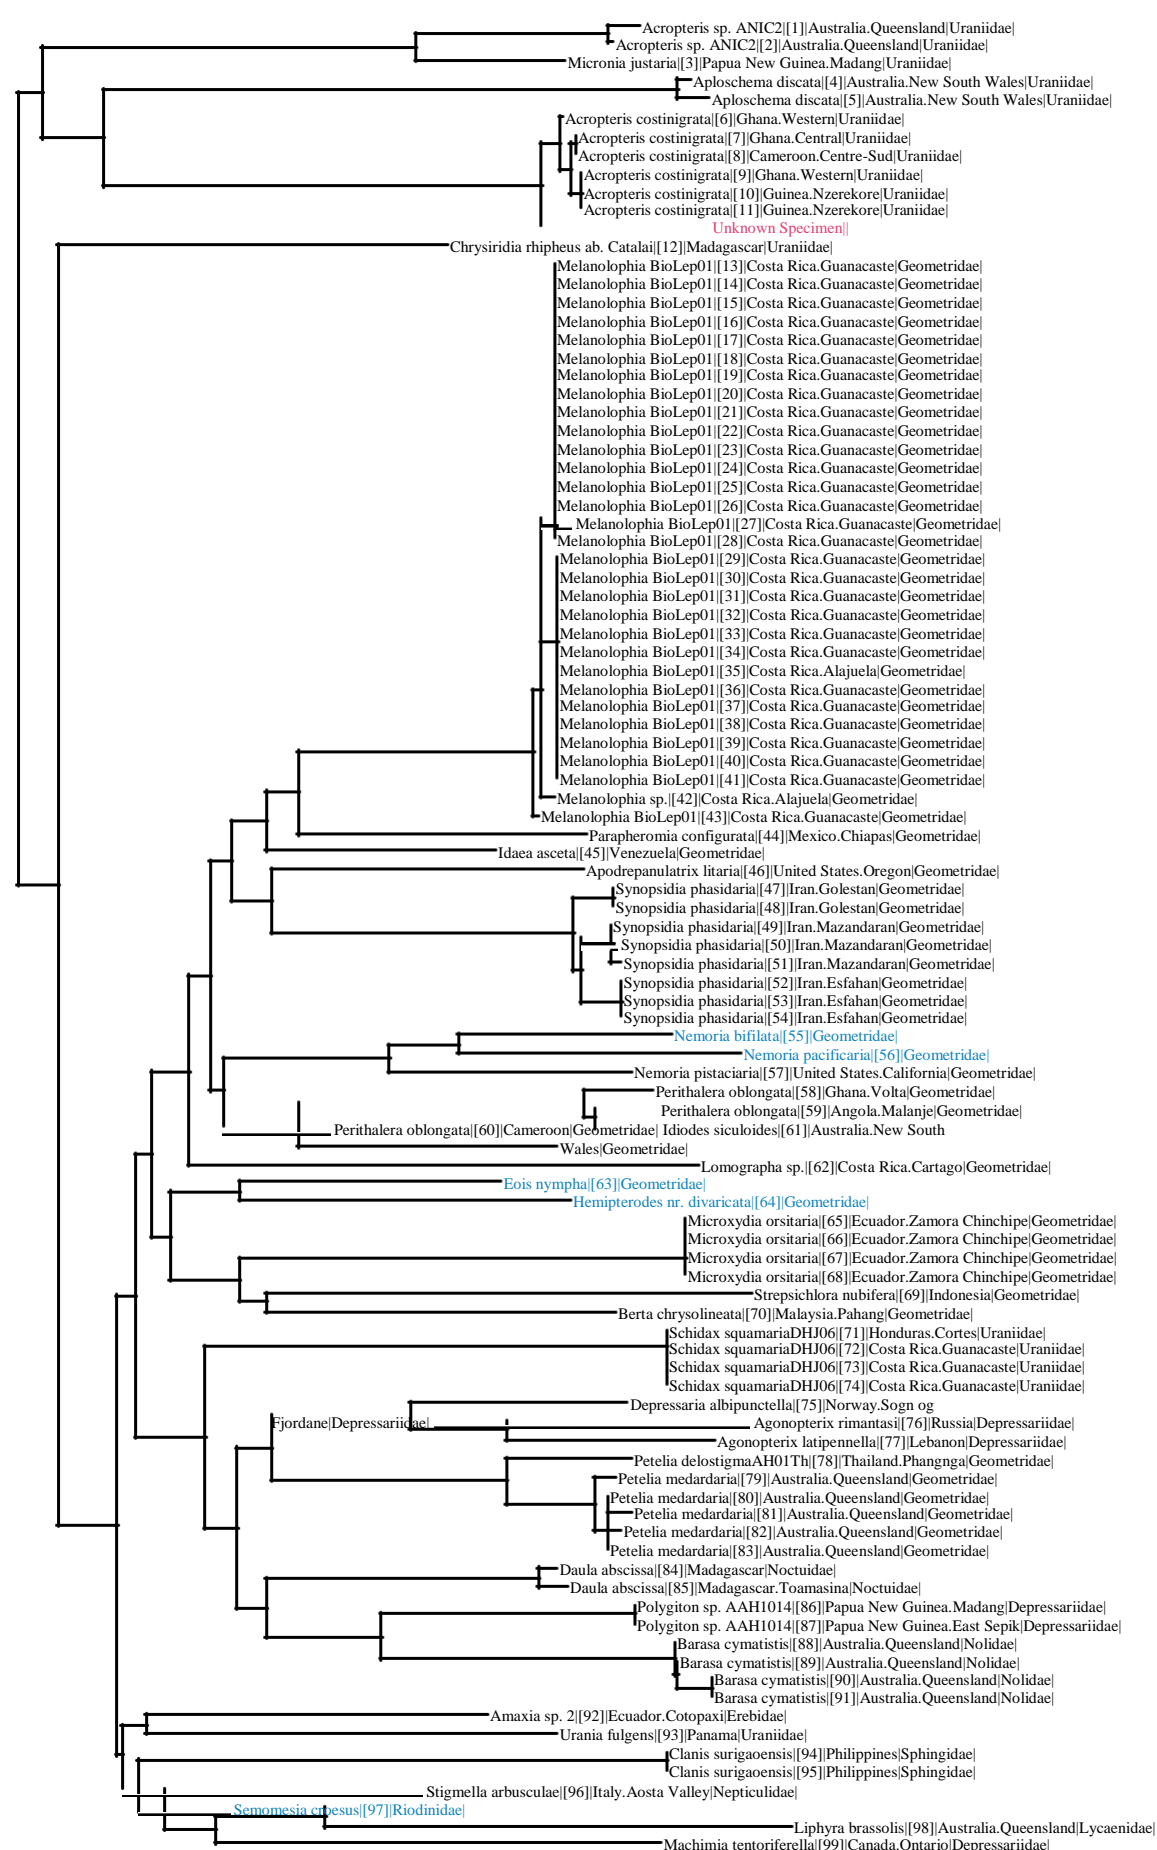

1 %

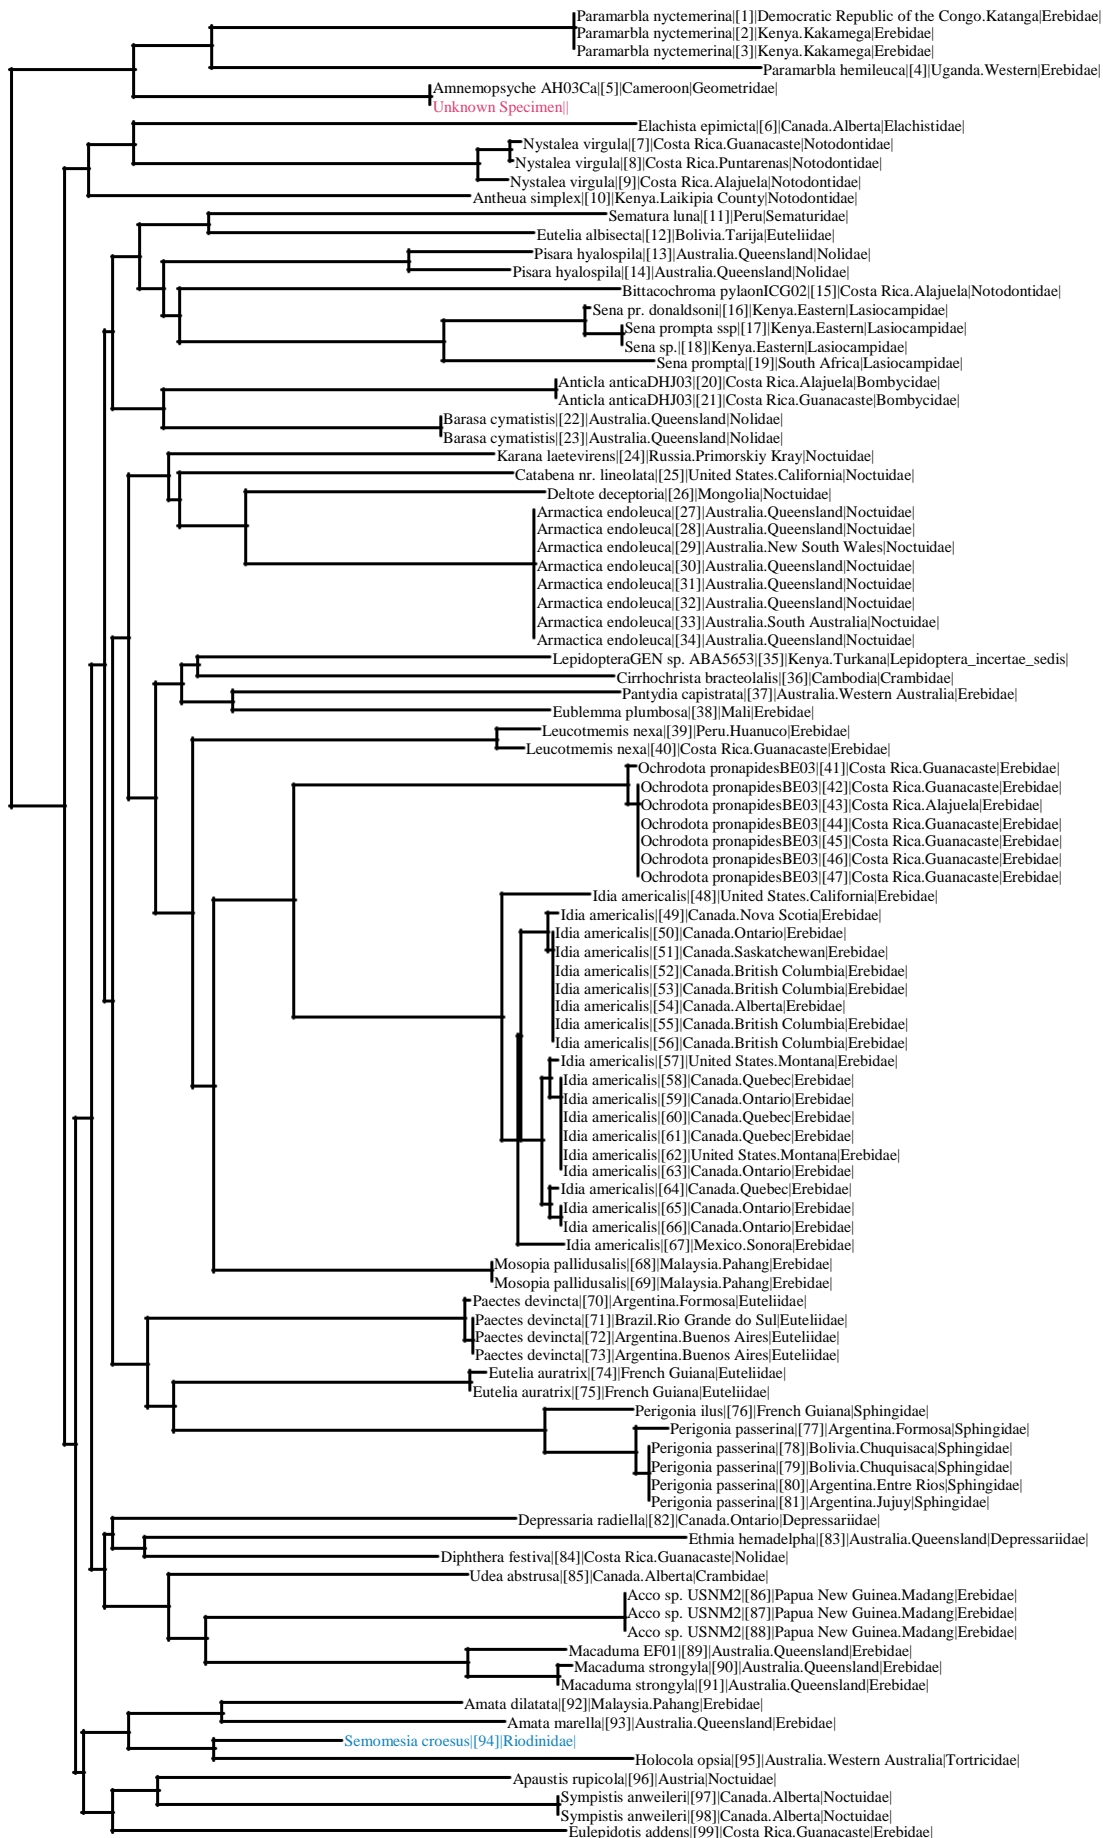

1 %

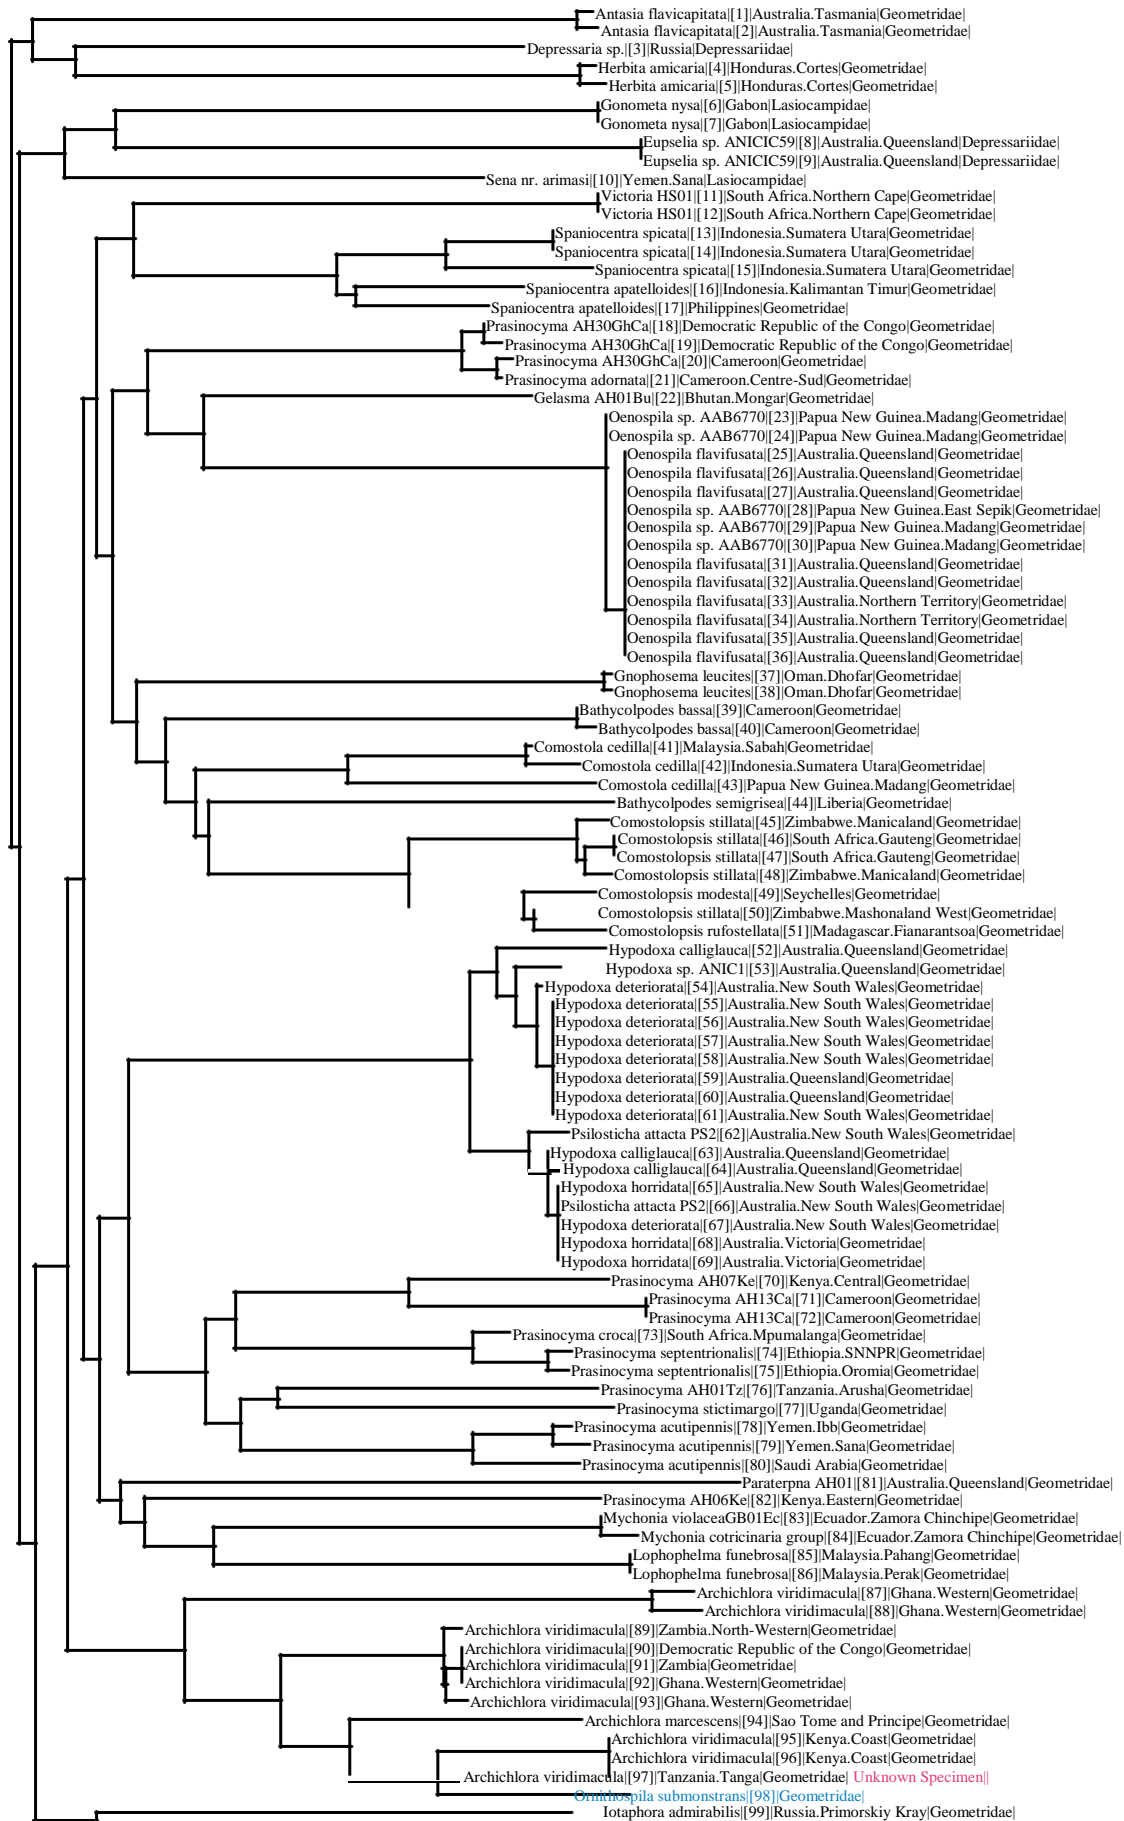

1 %

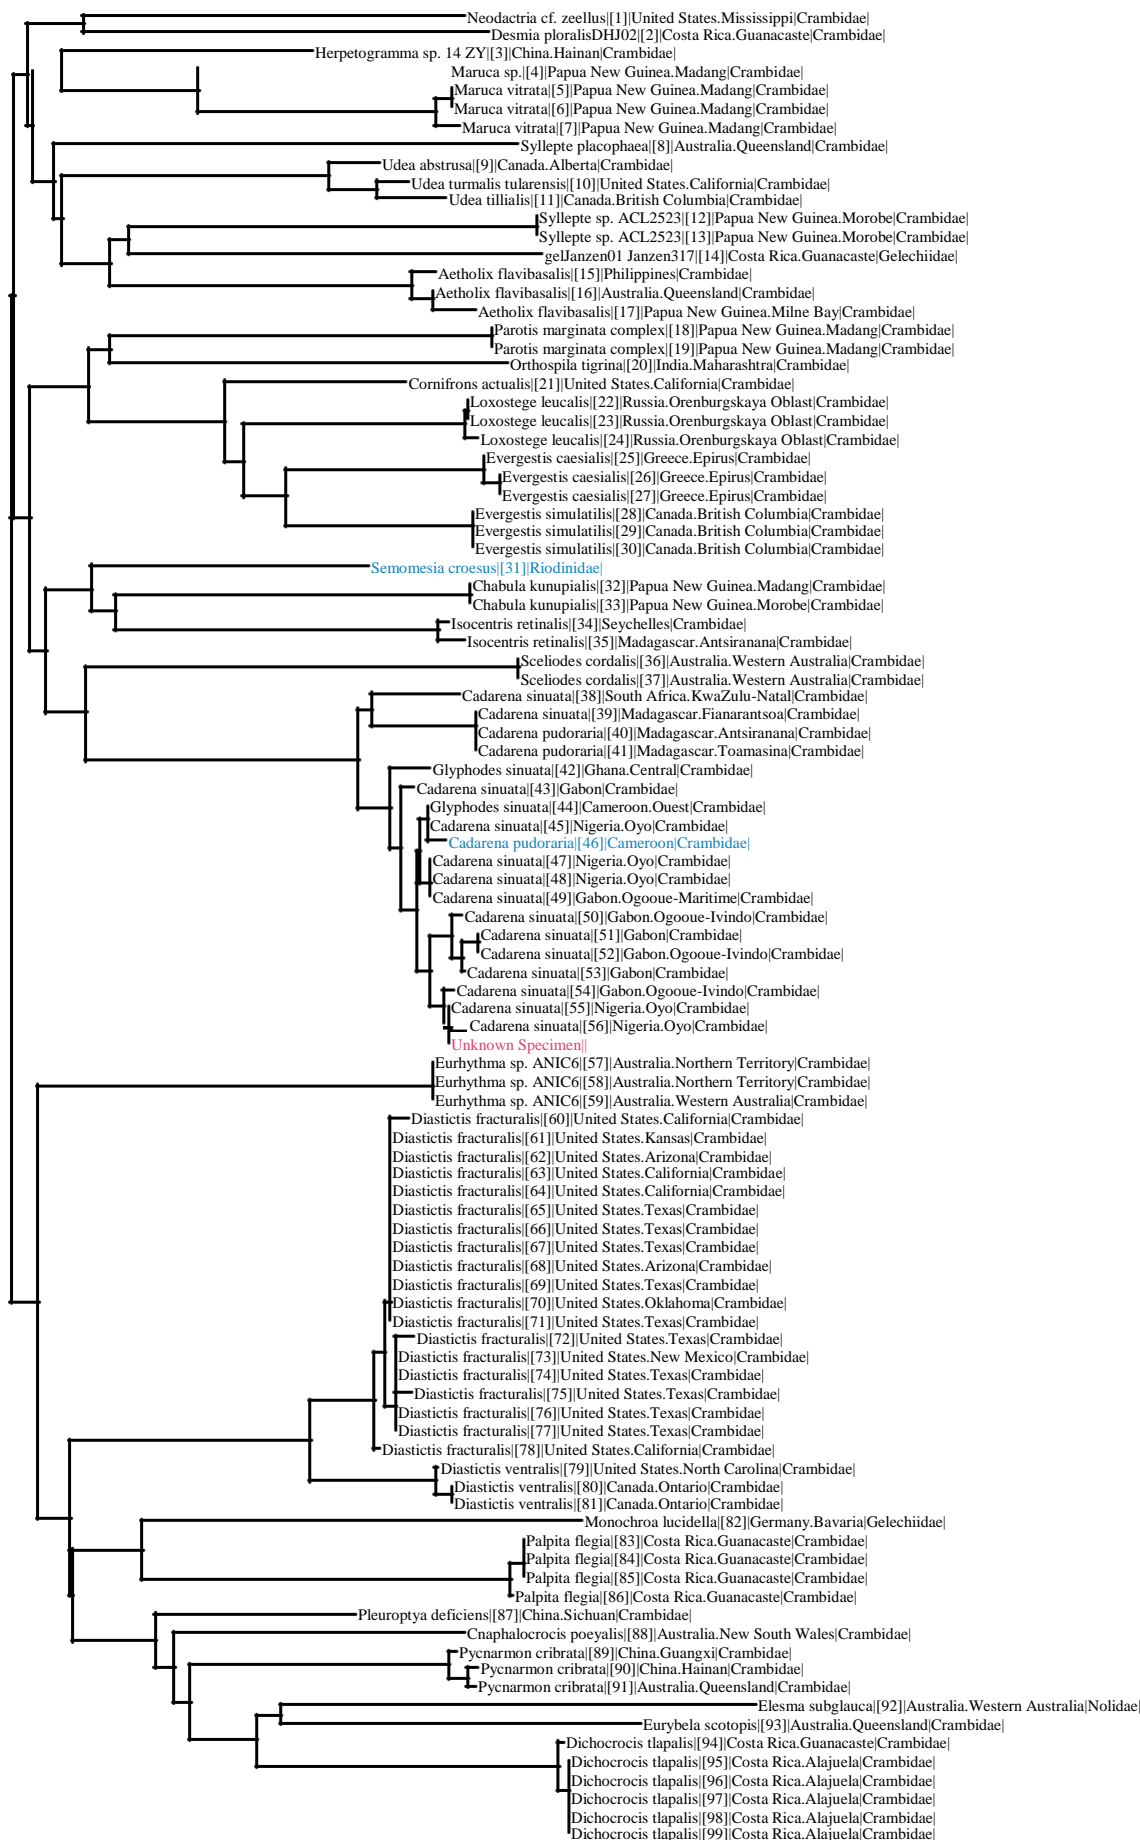

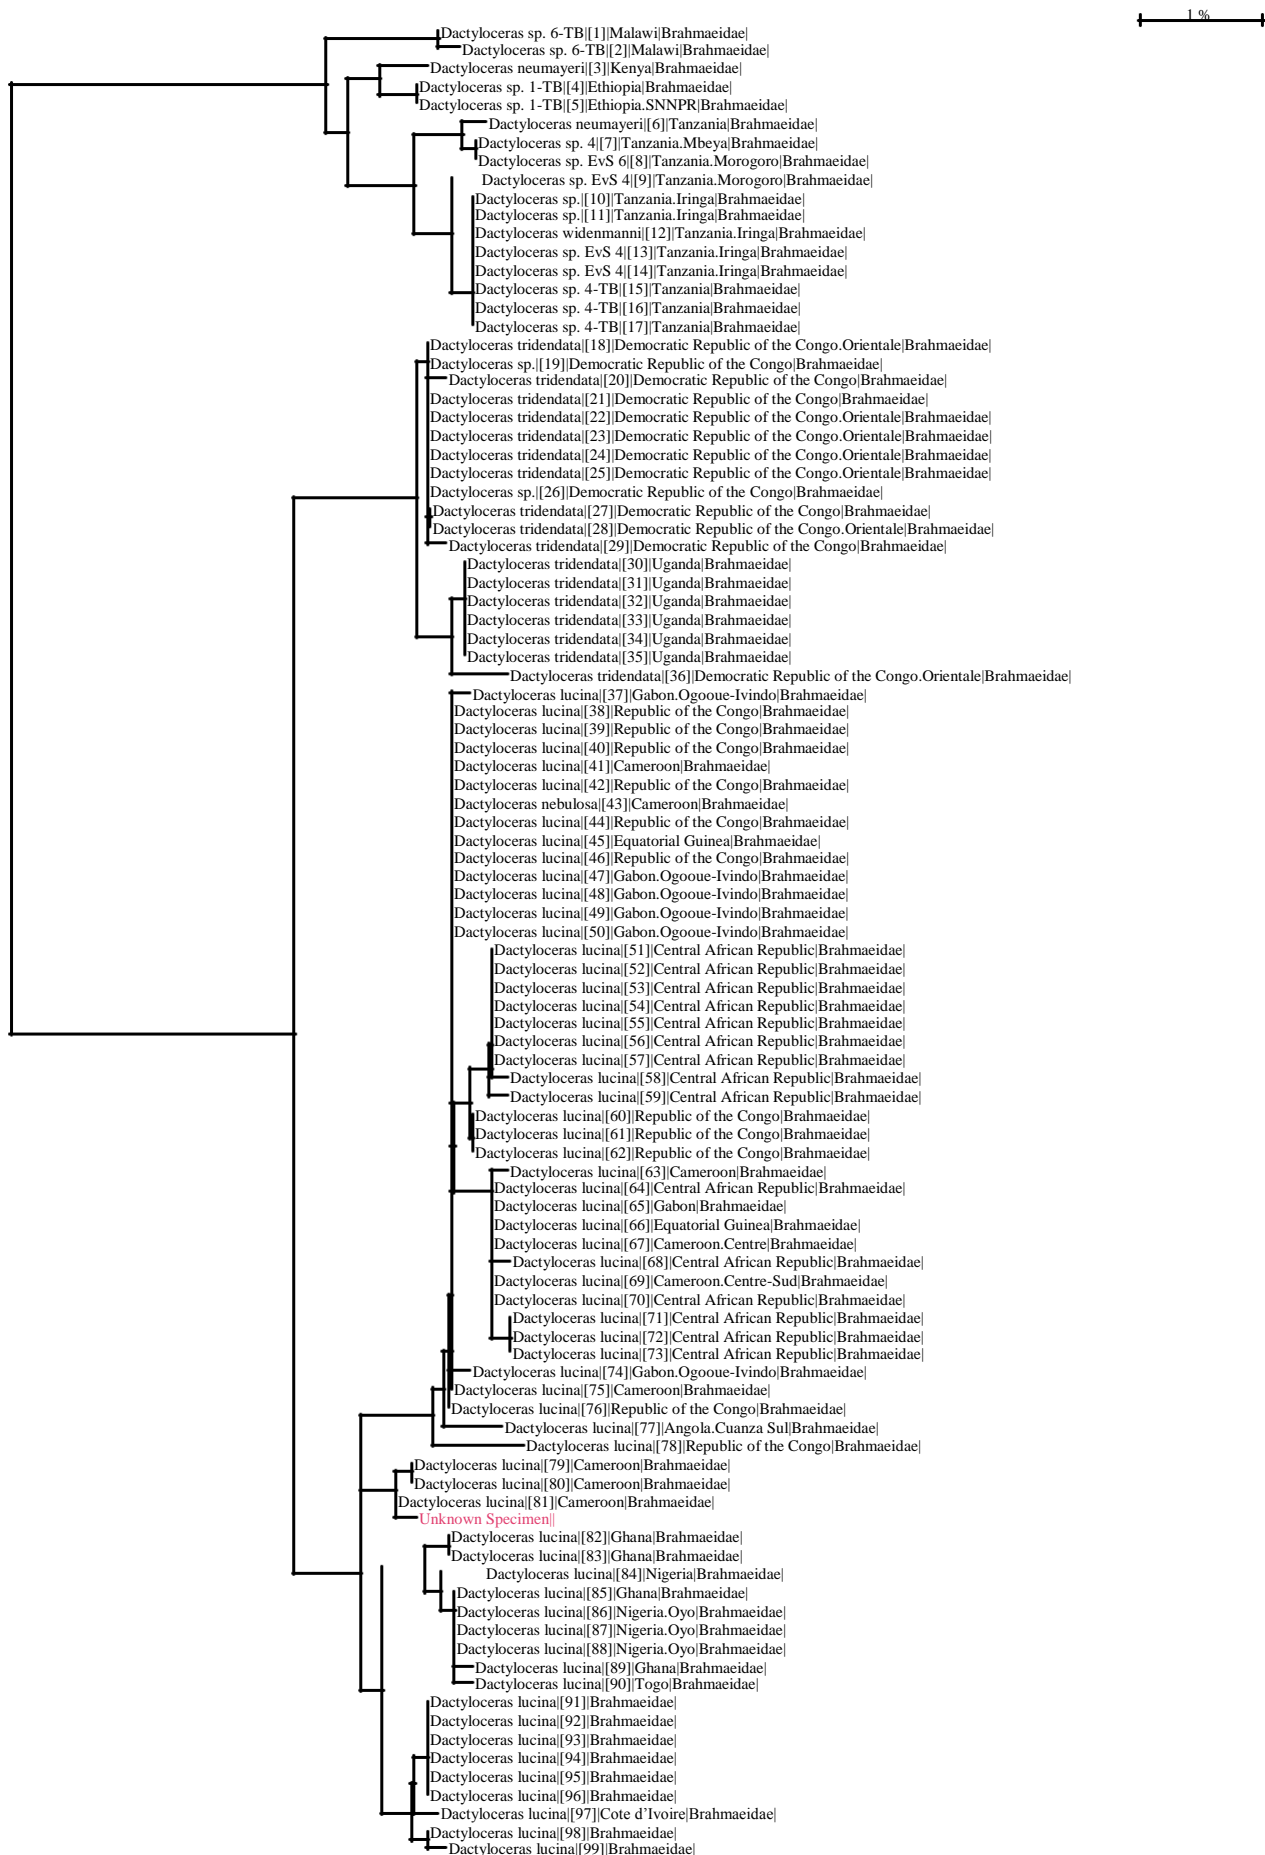



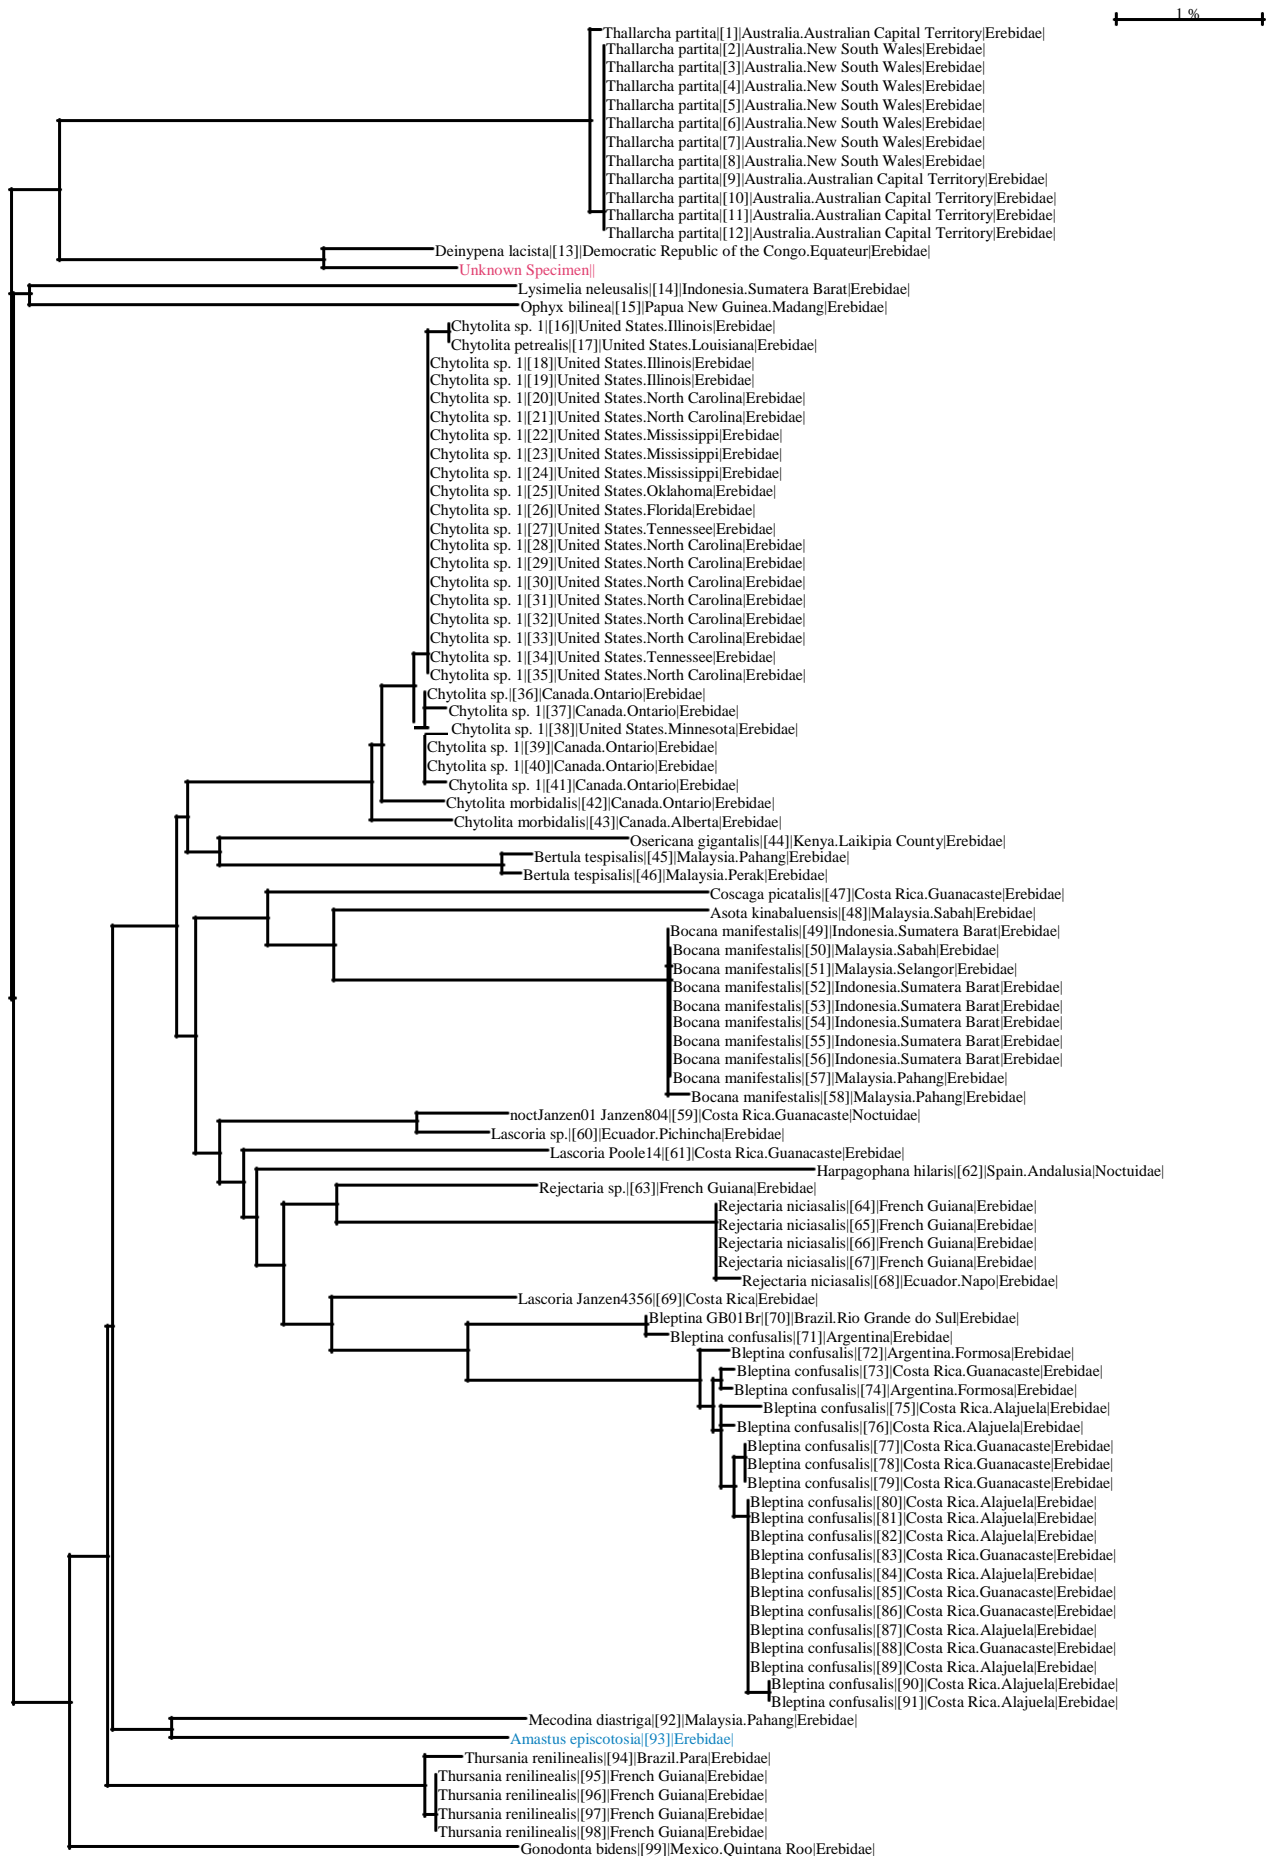

# BOLD TaxonID Tree

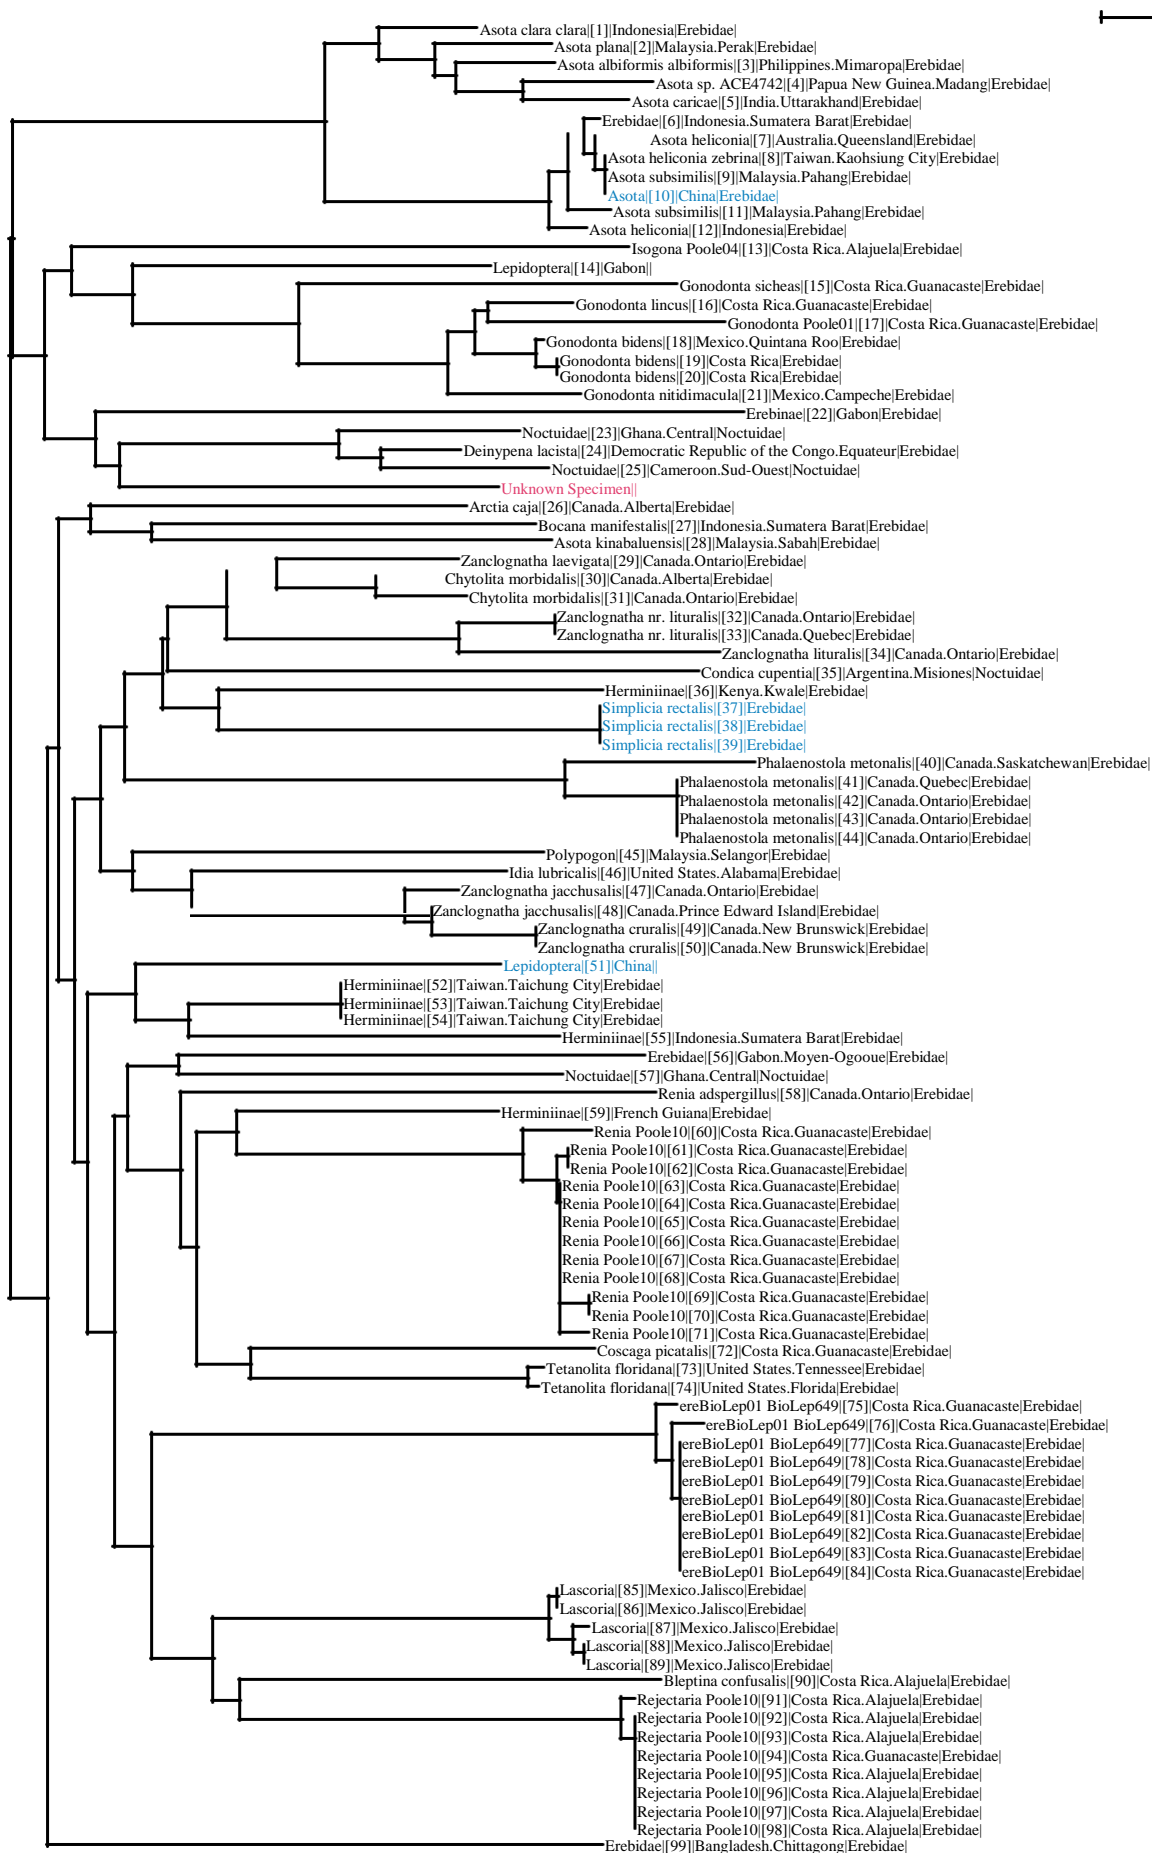

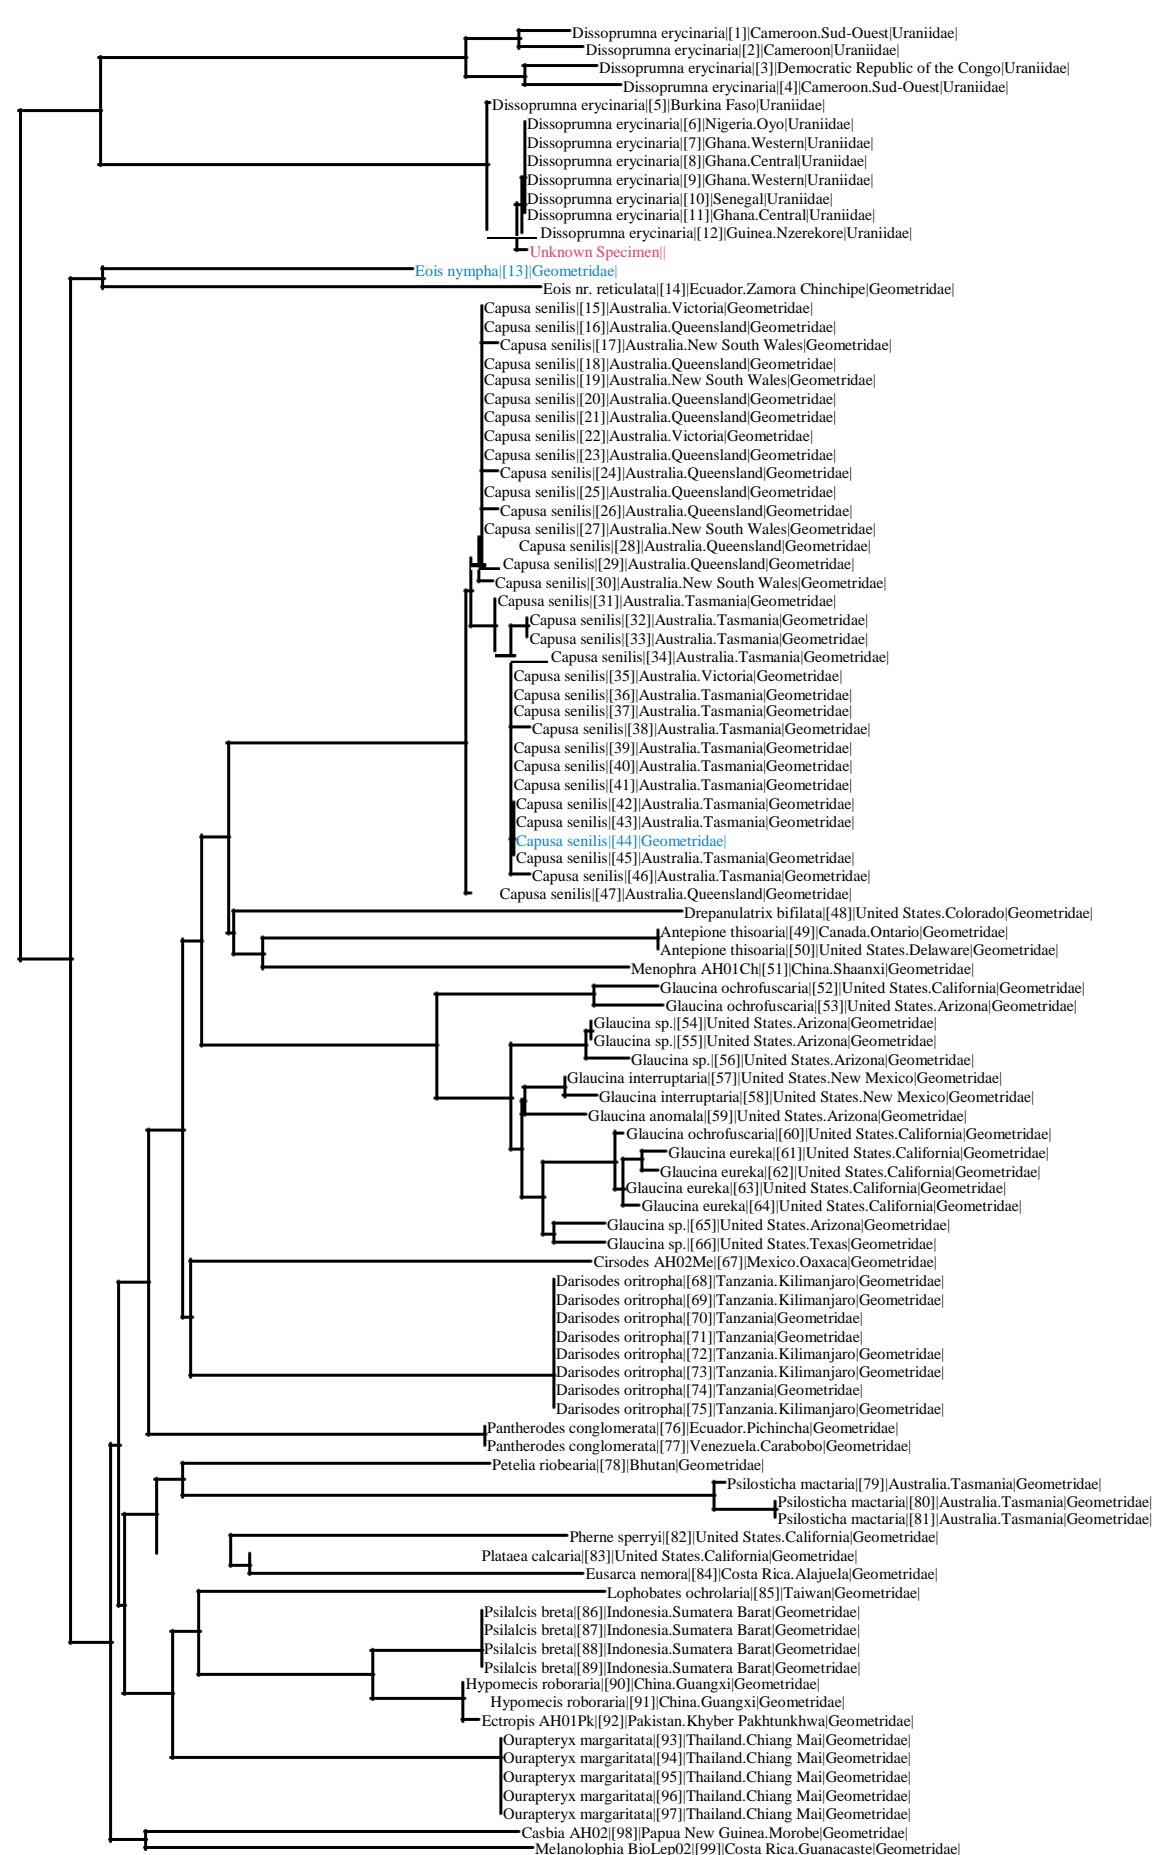



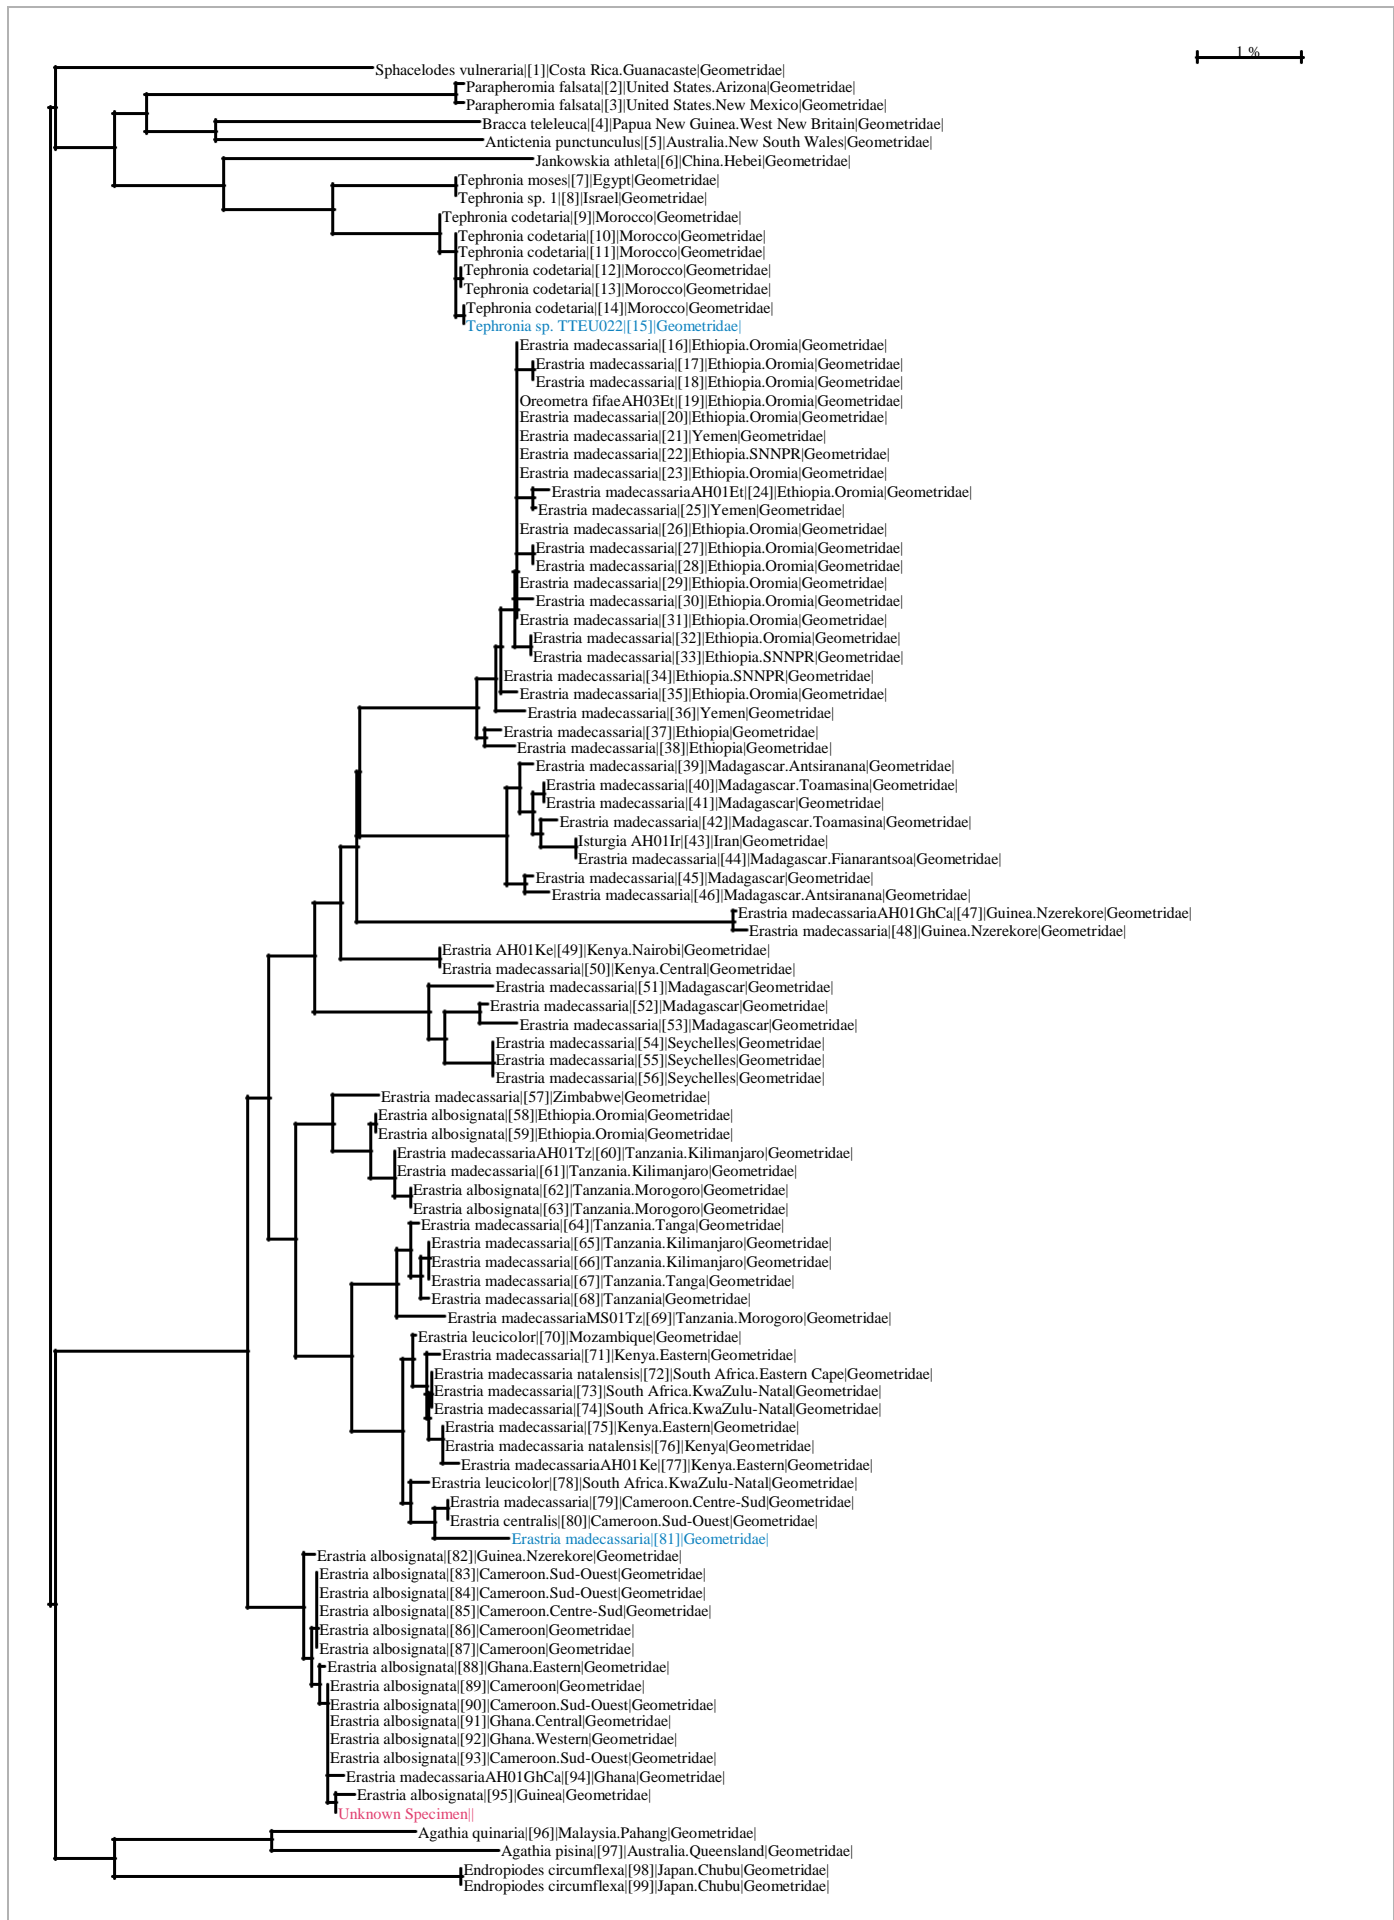

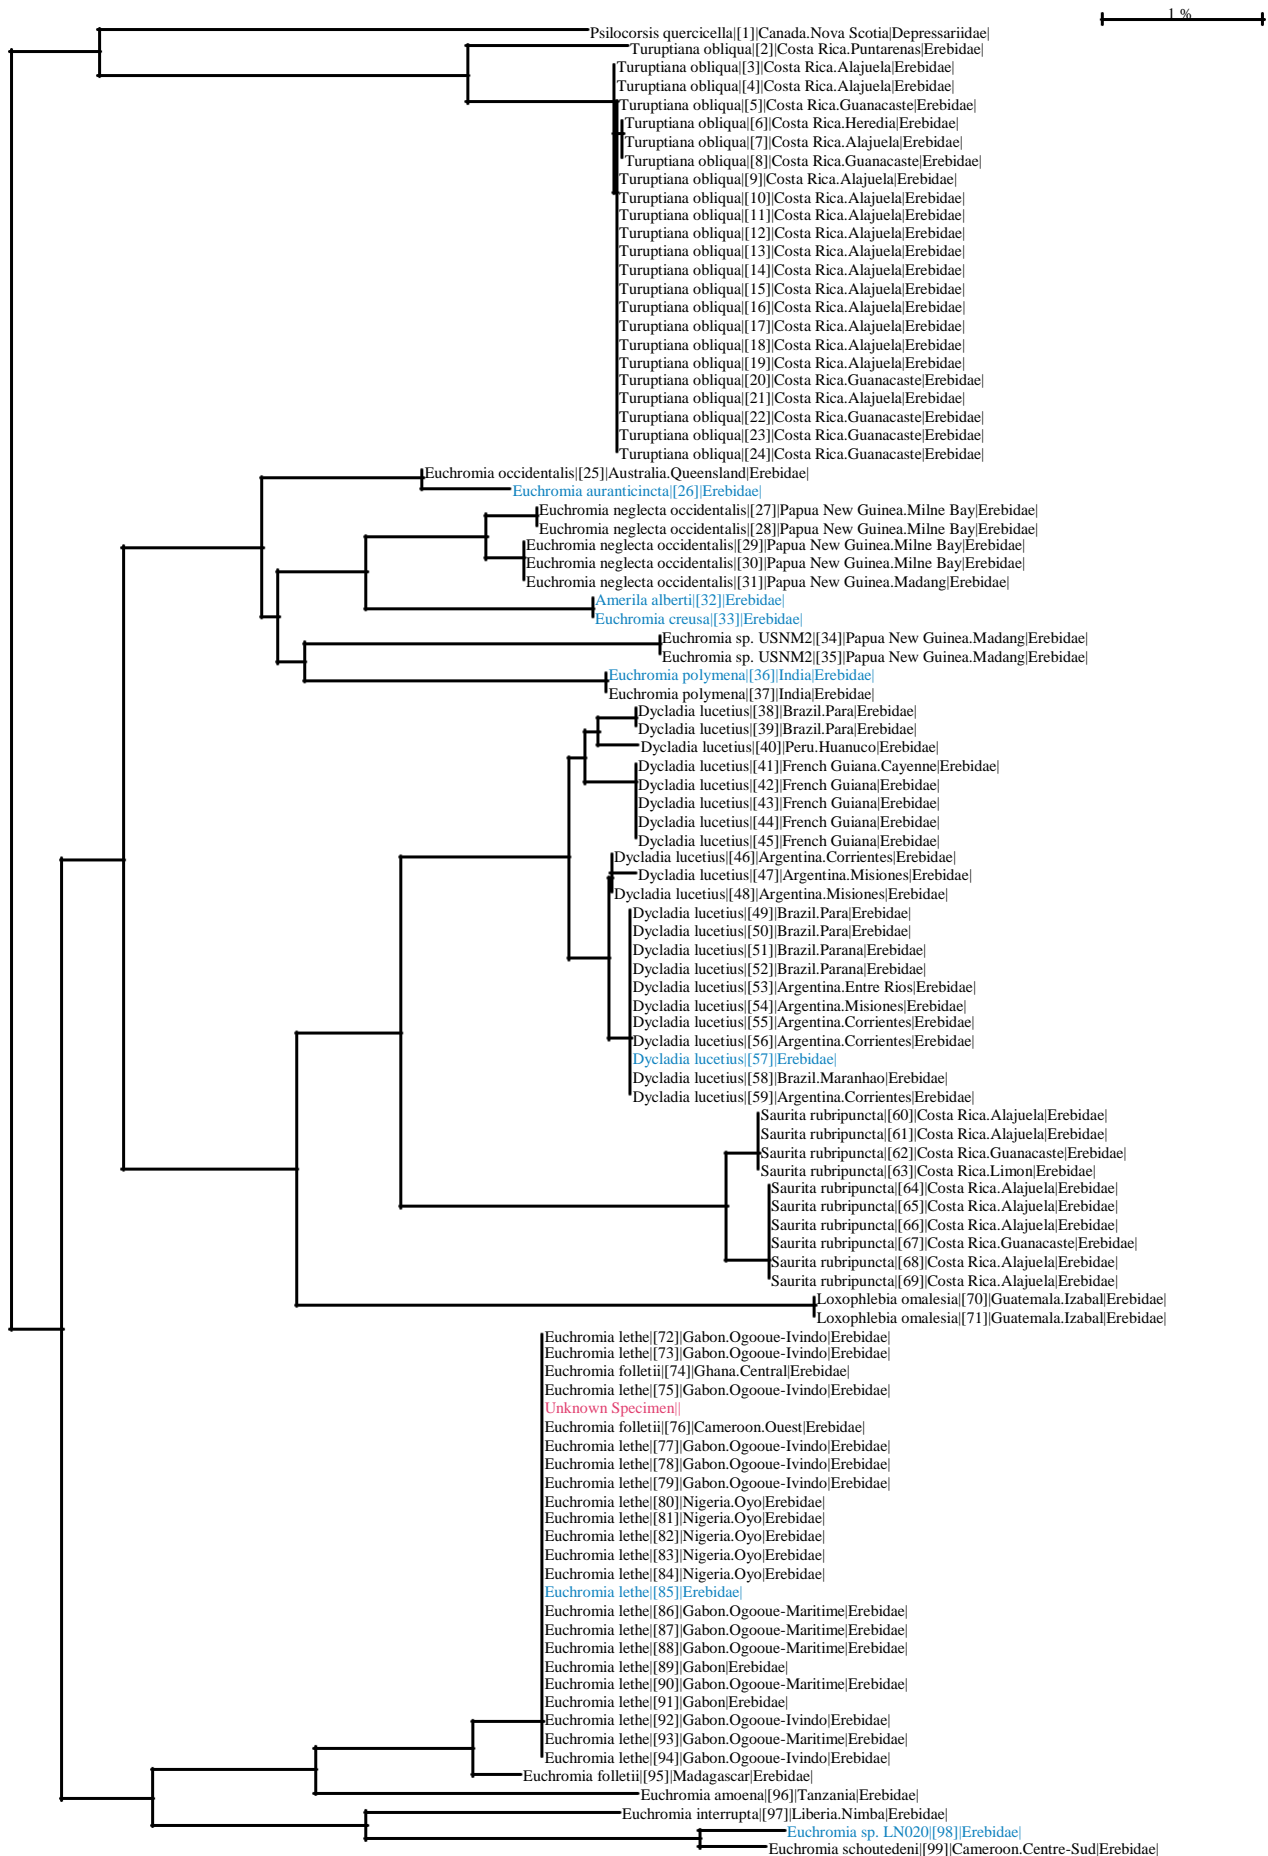

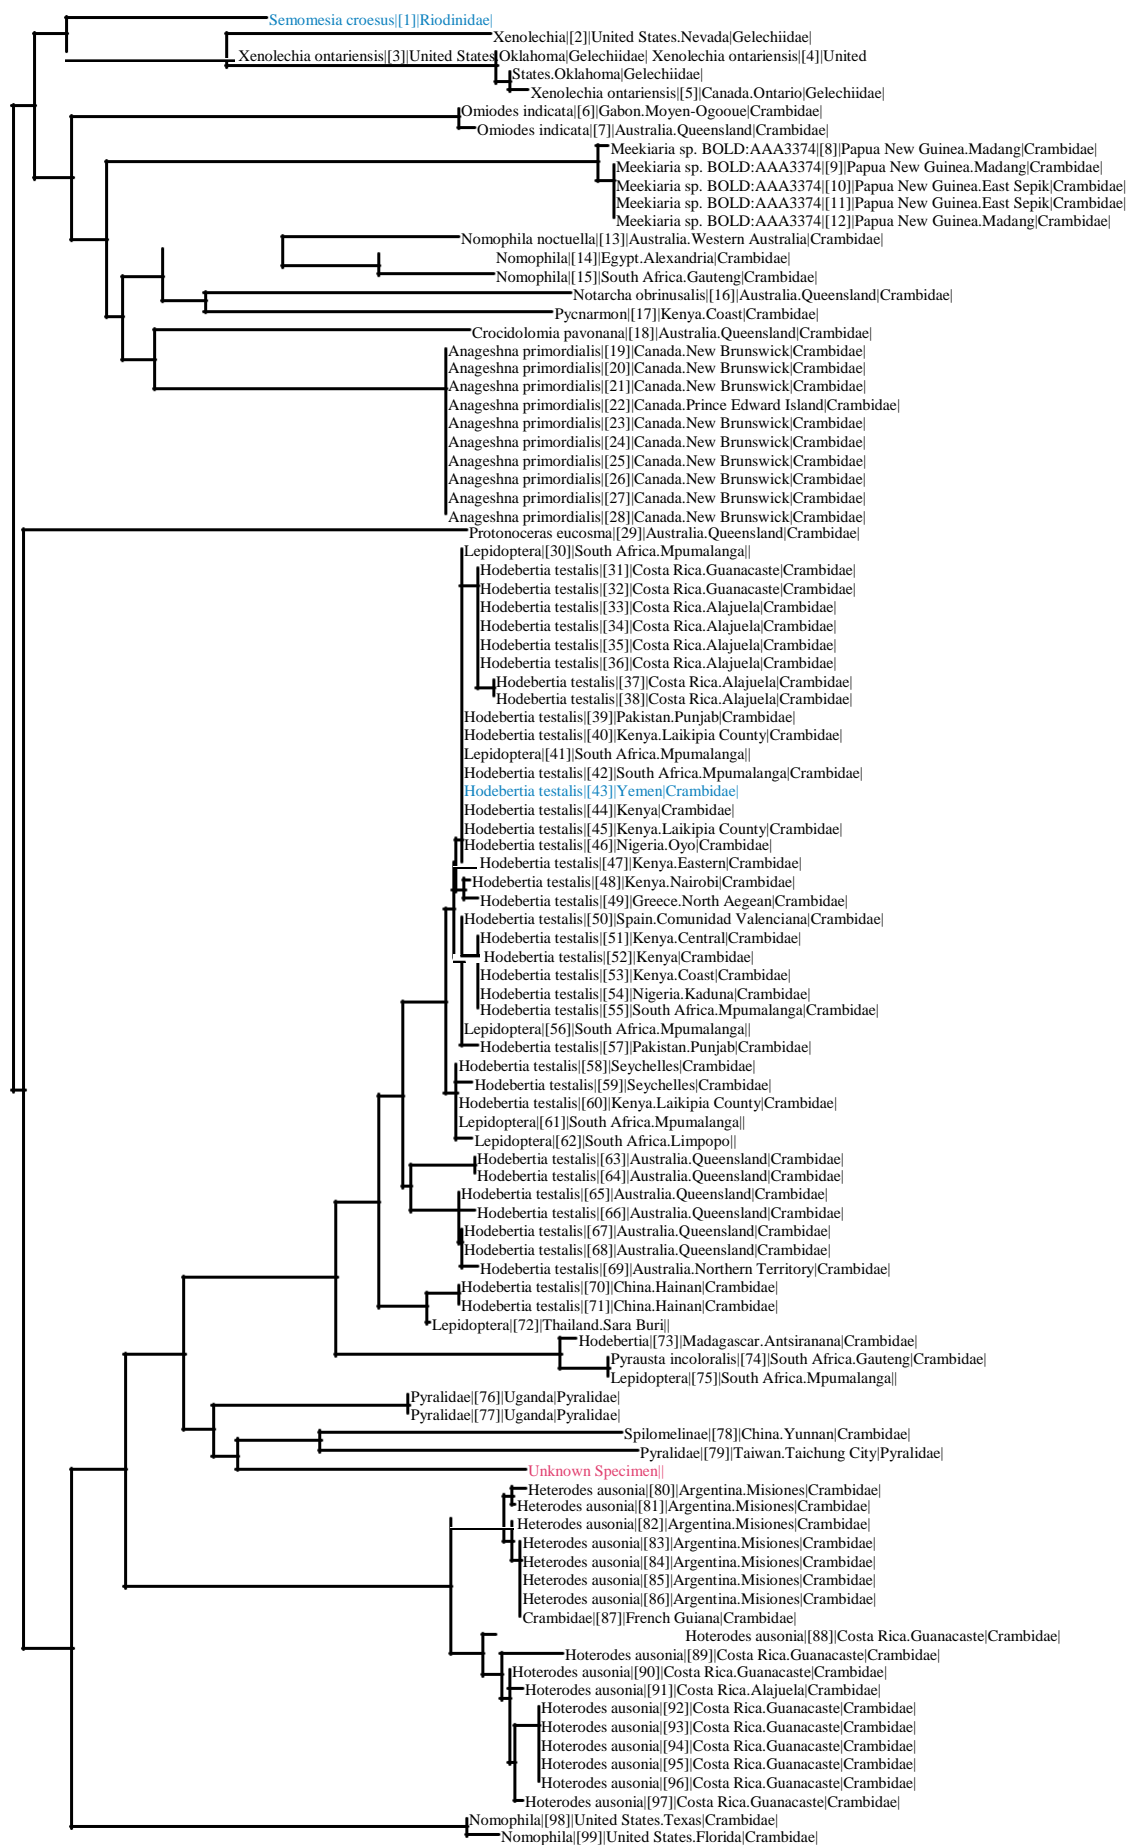

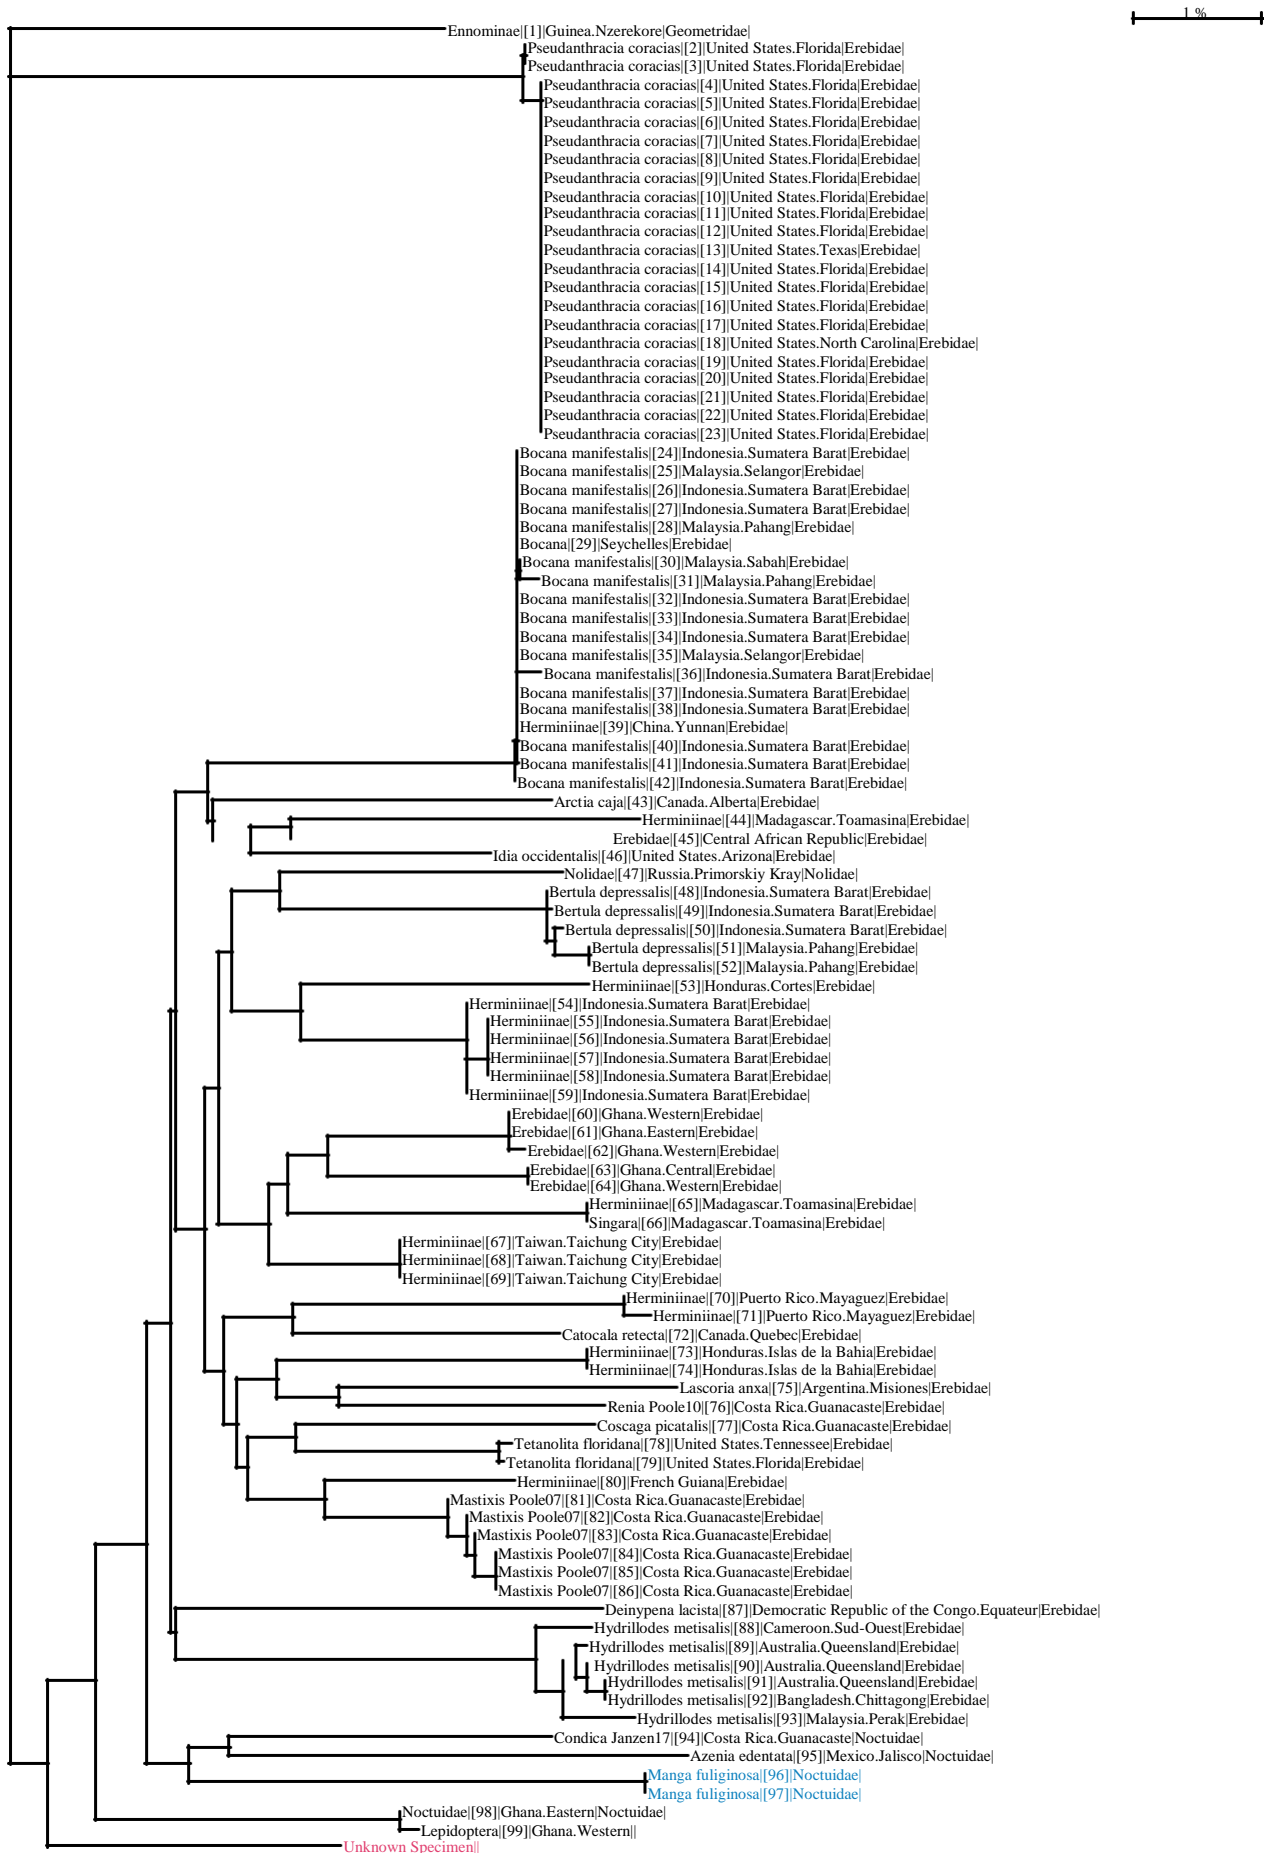

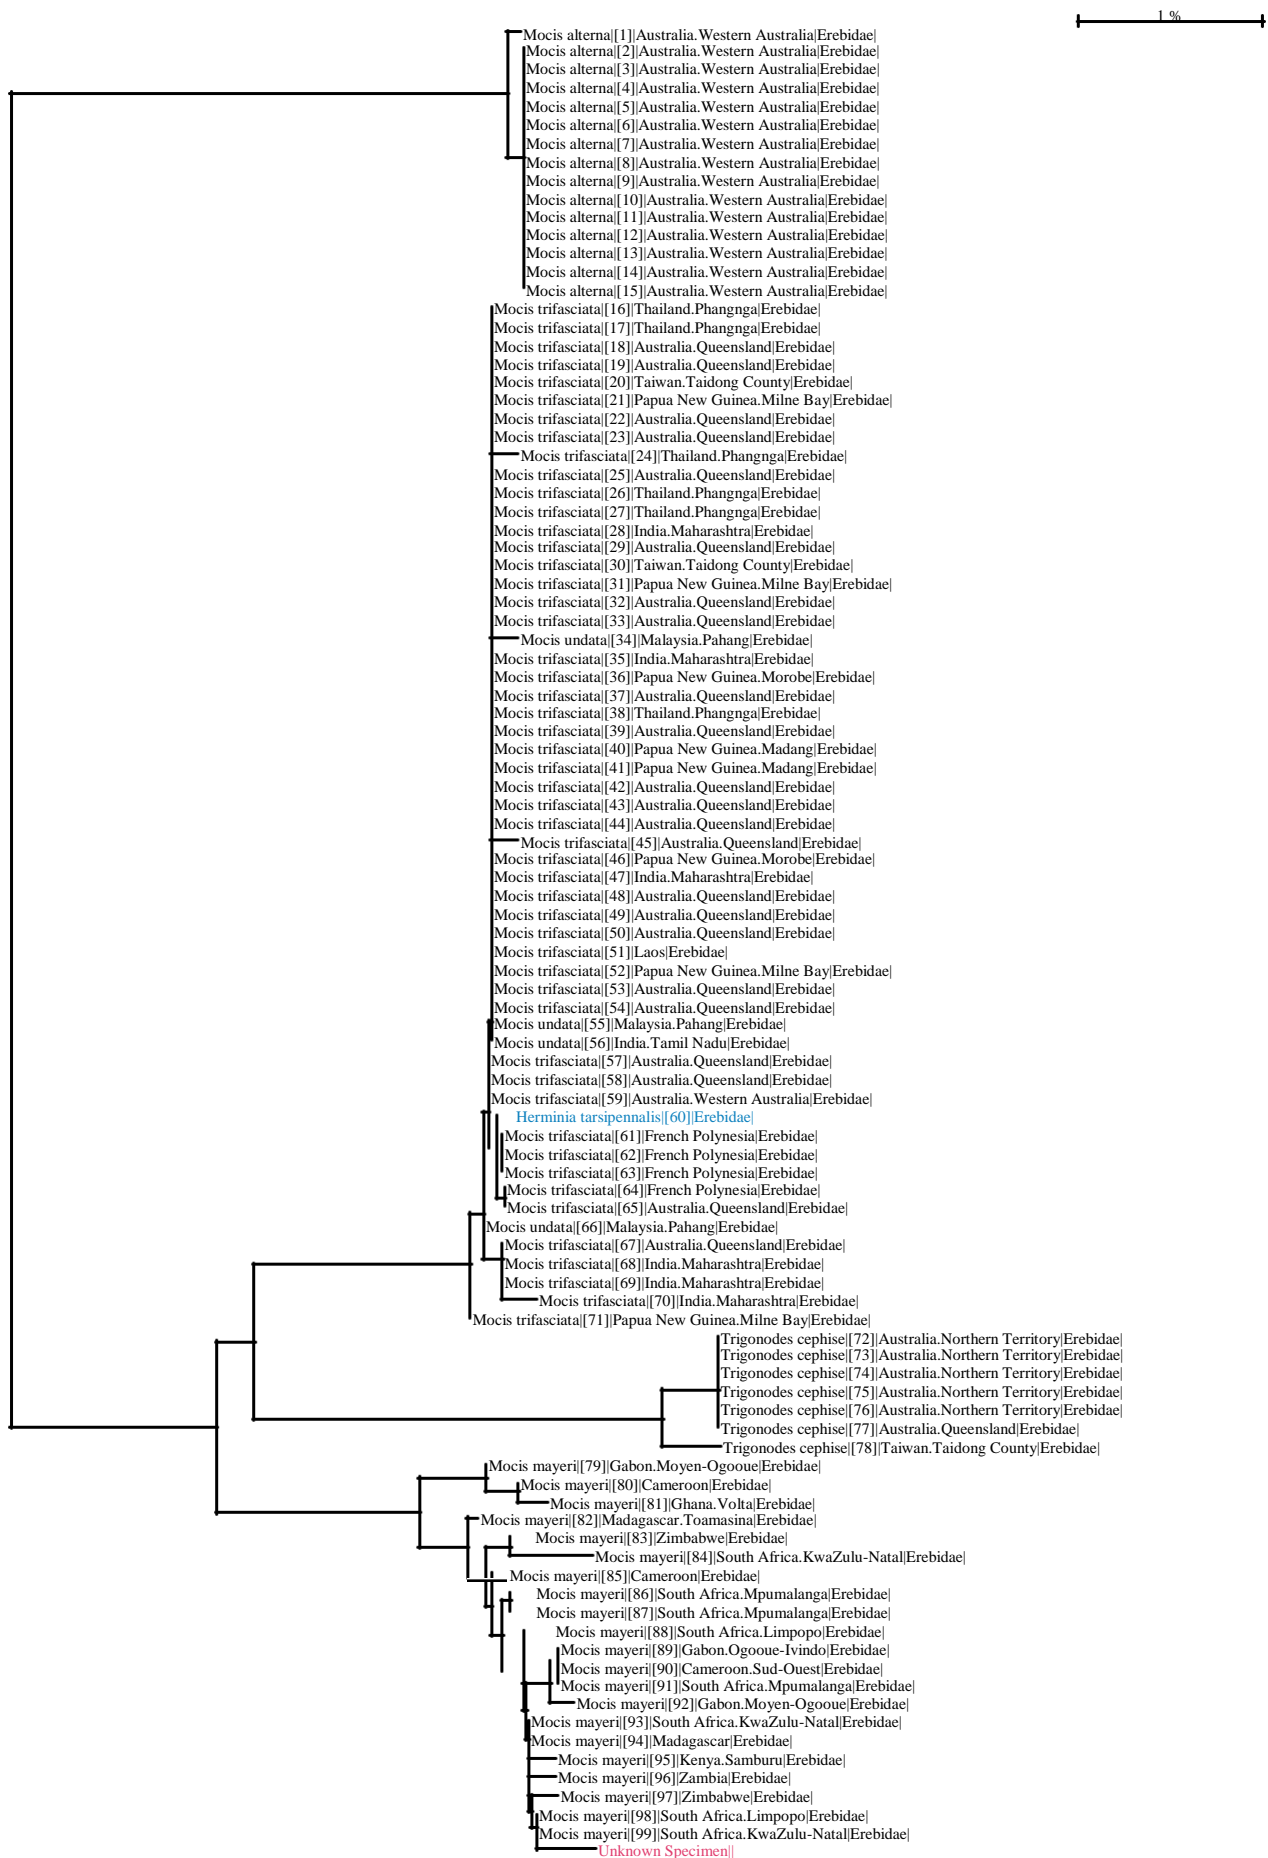



1 %

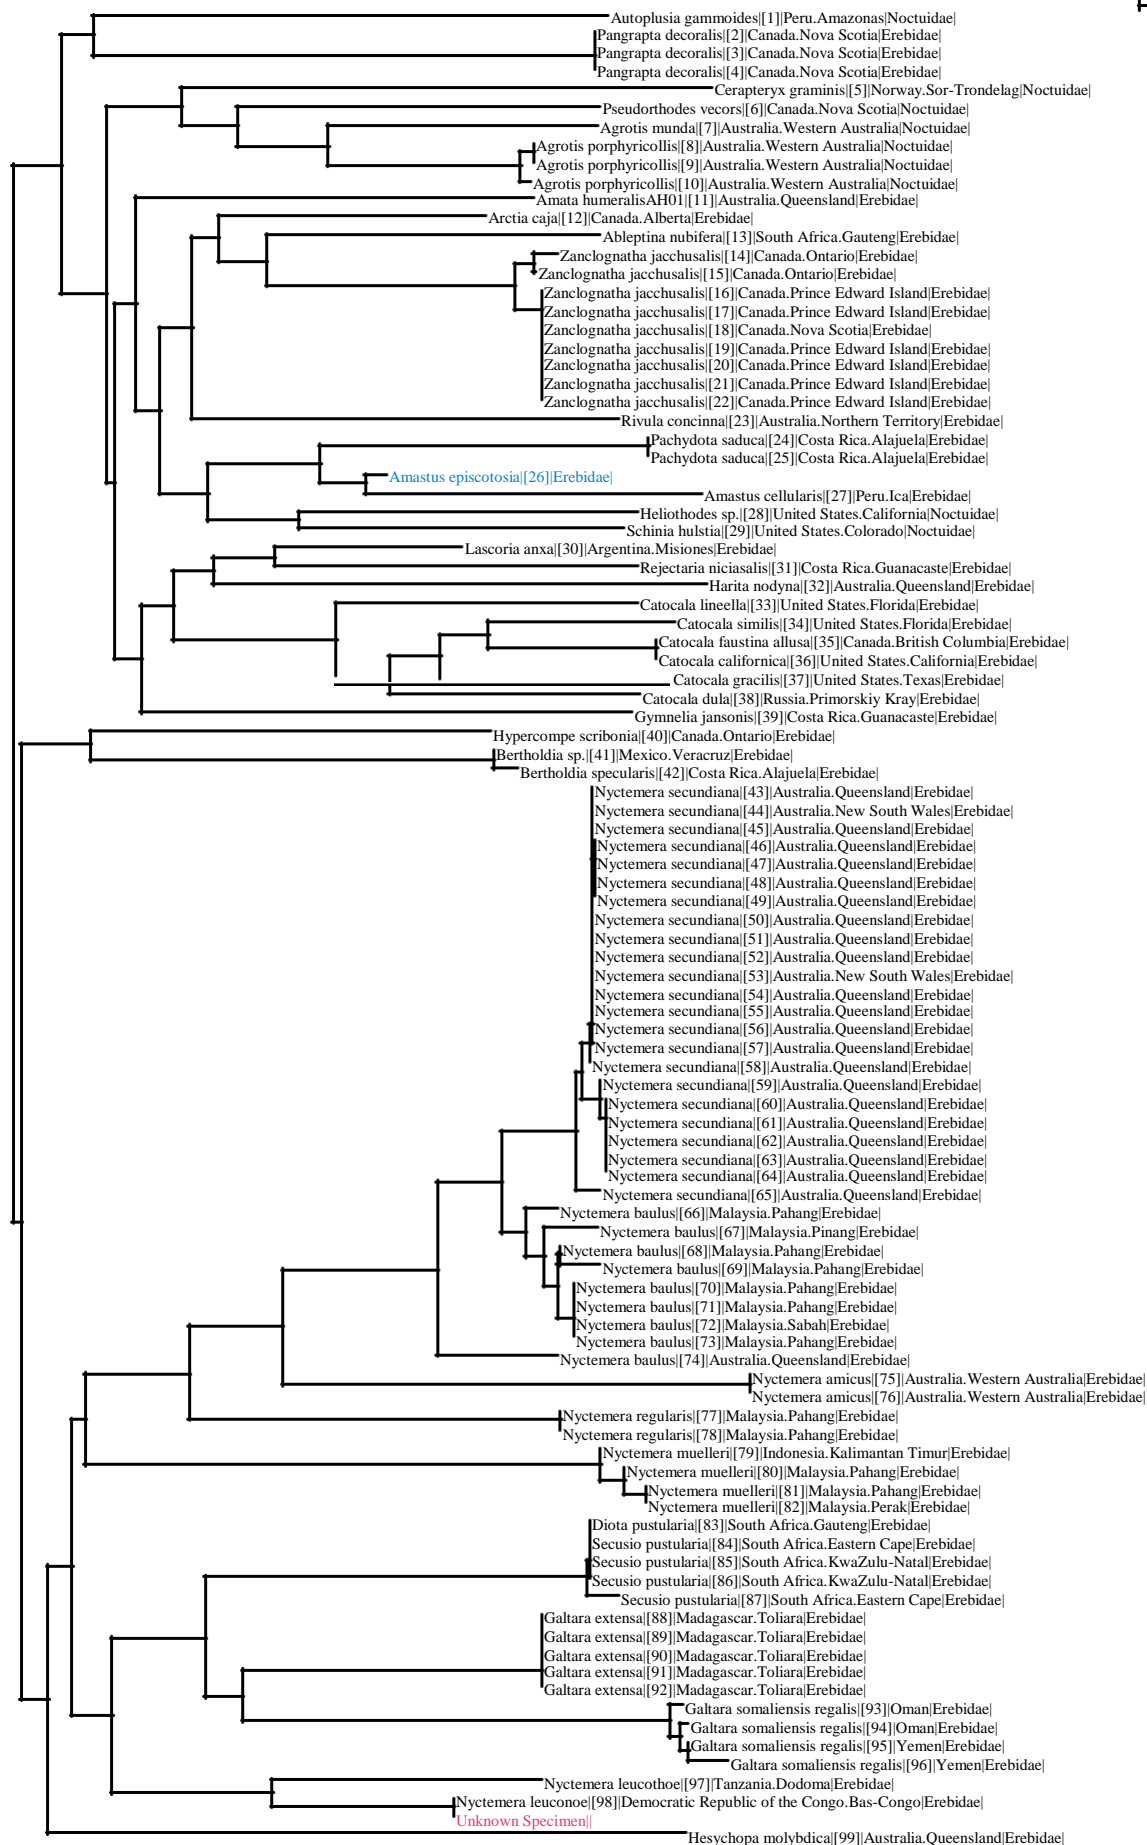

1 %

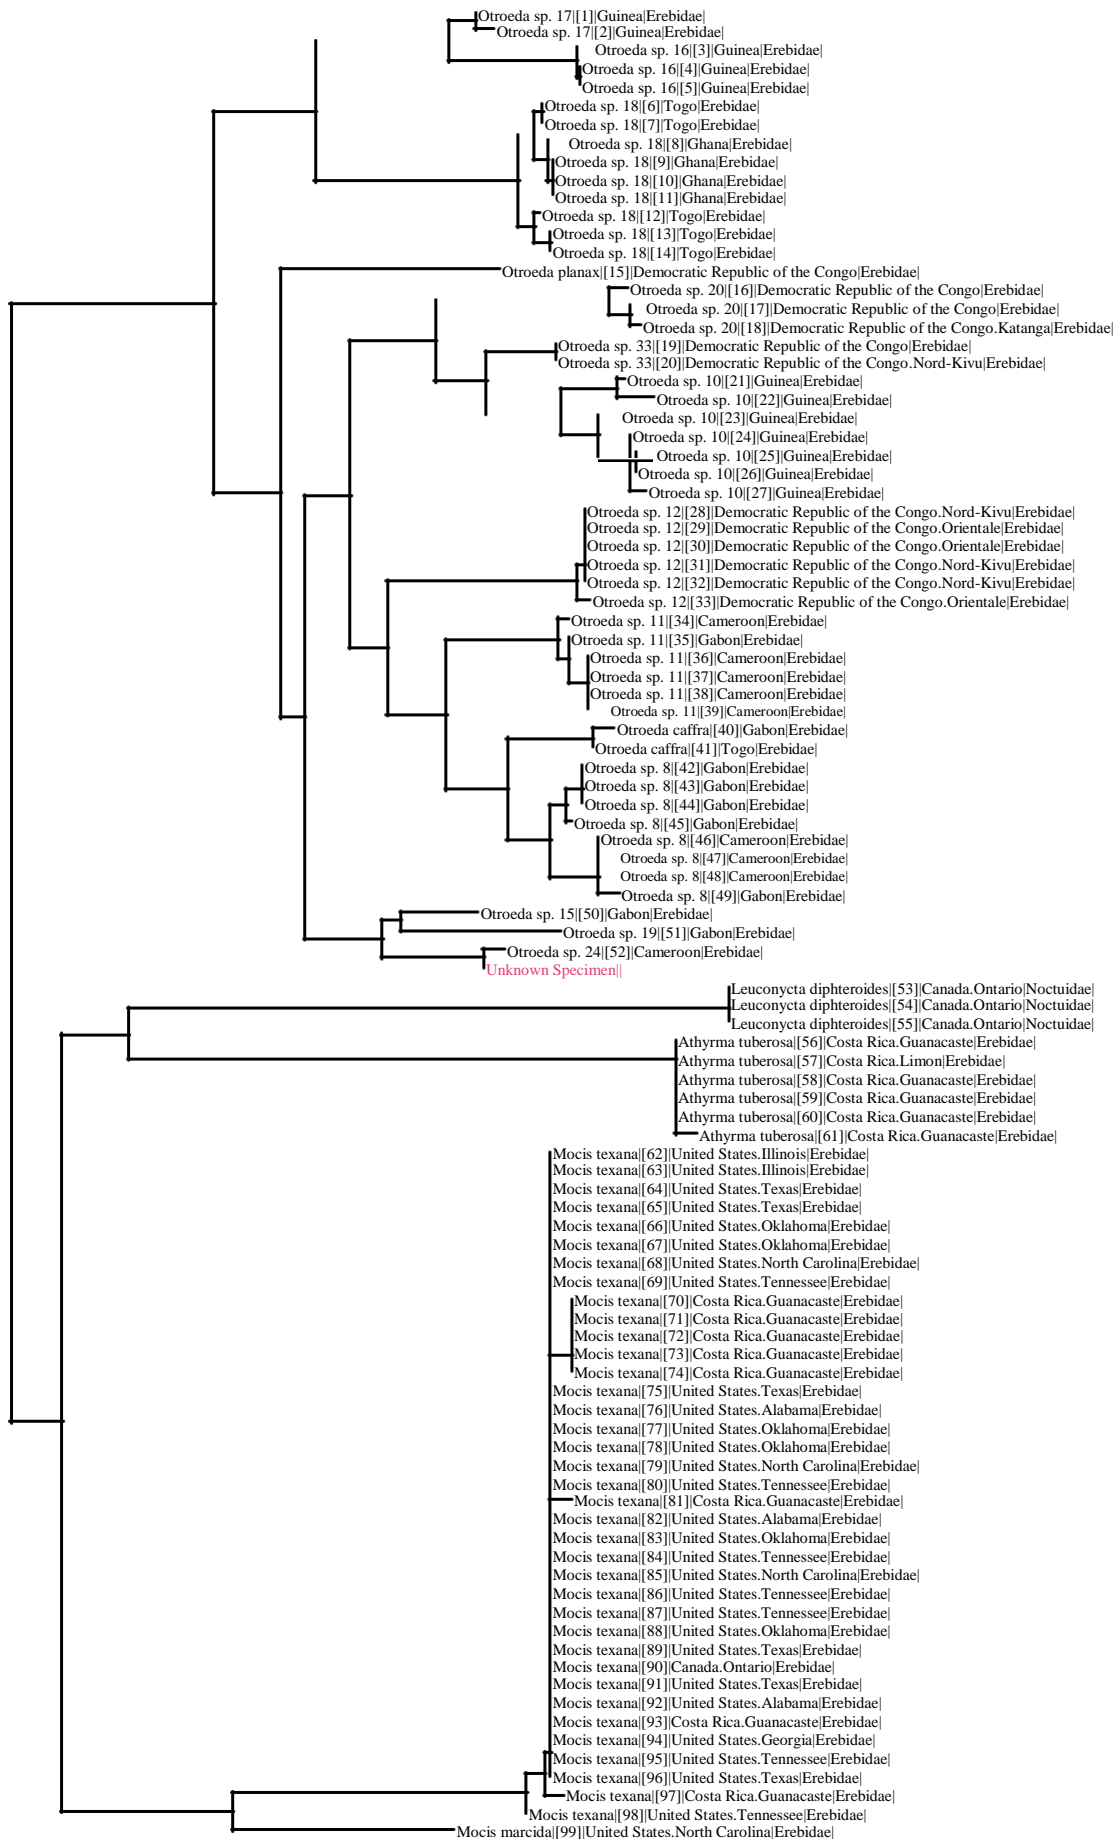

1 %

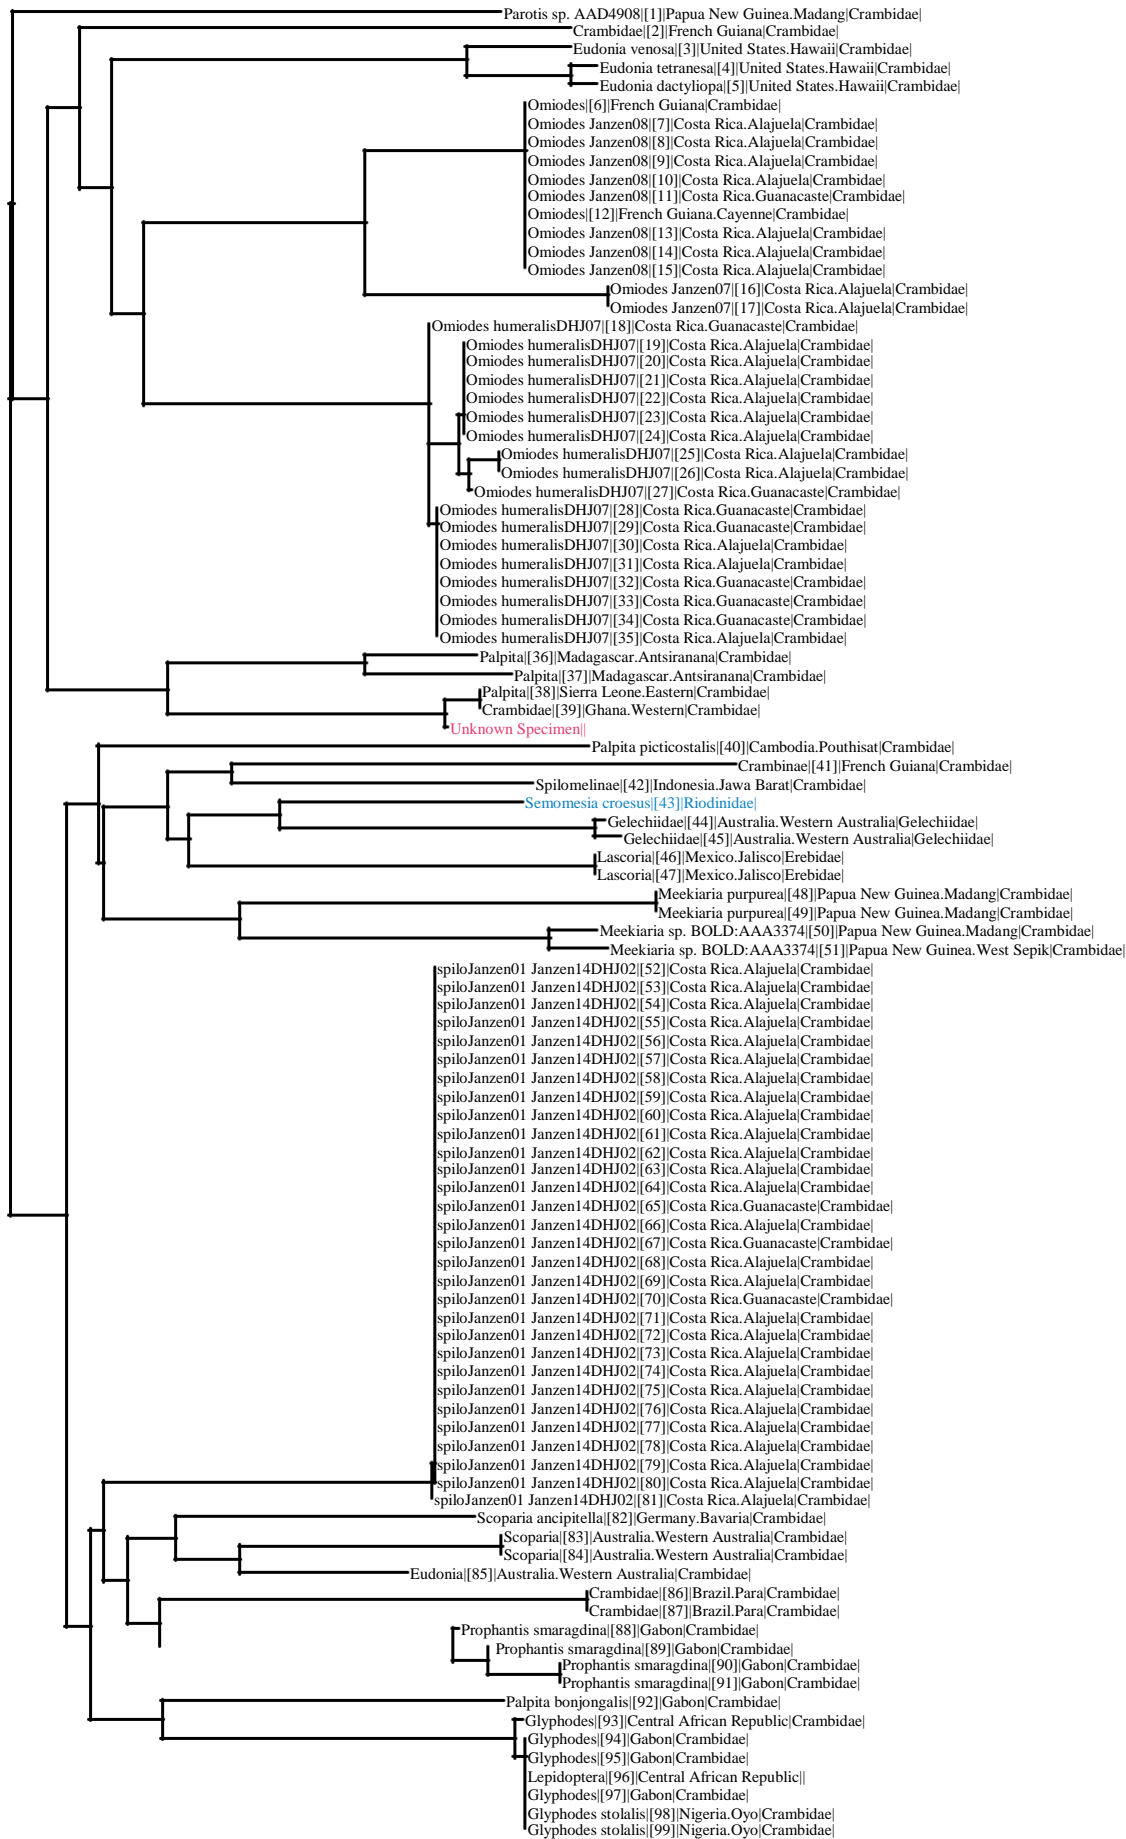

1 %

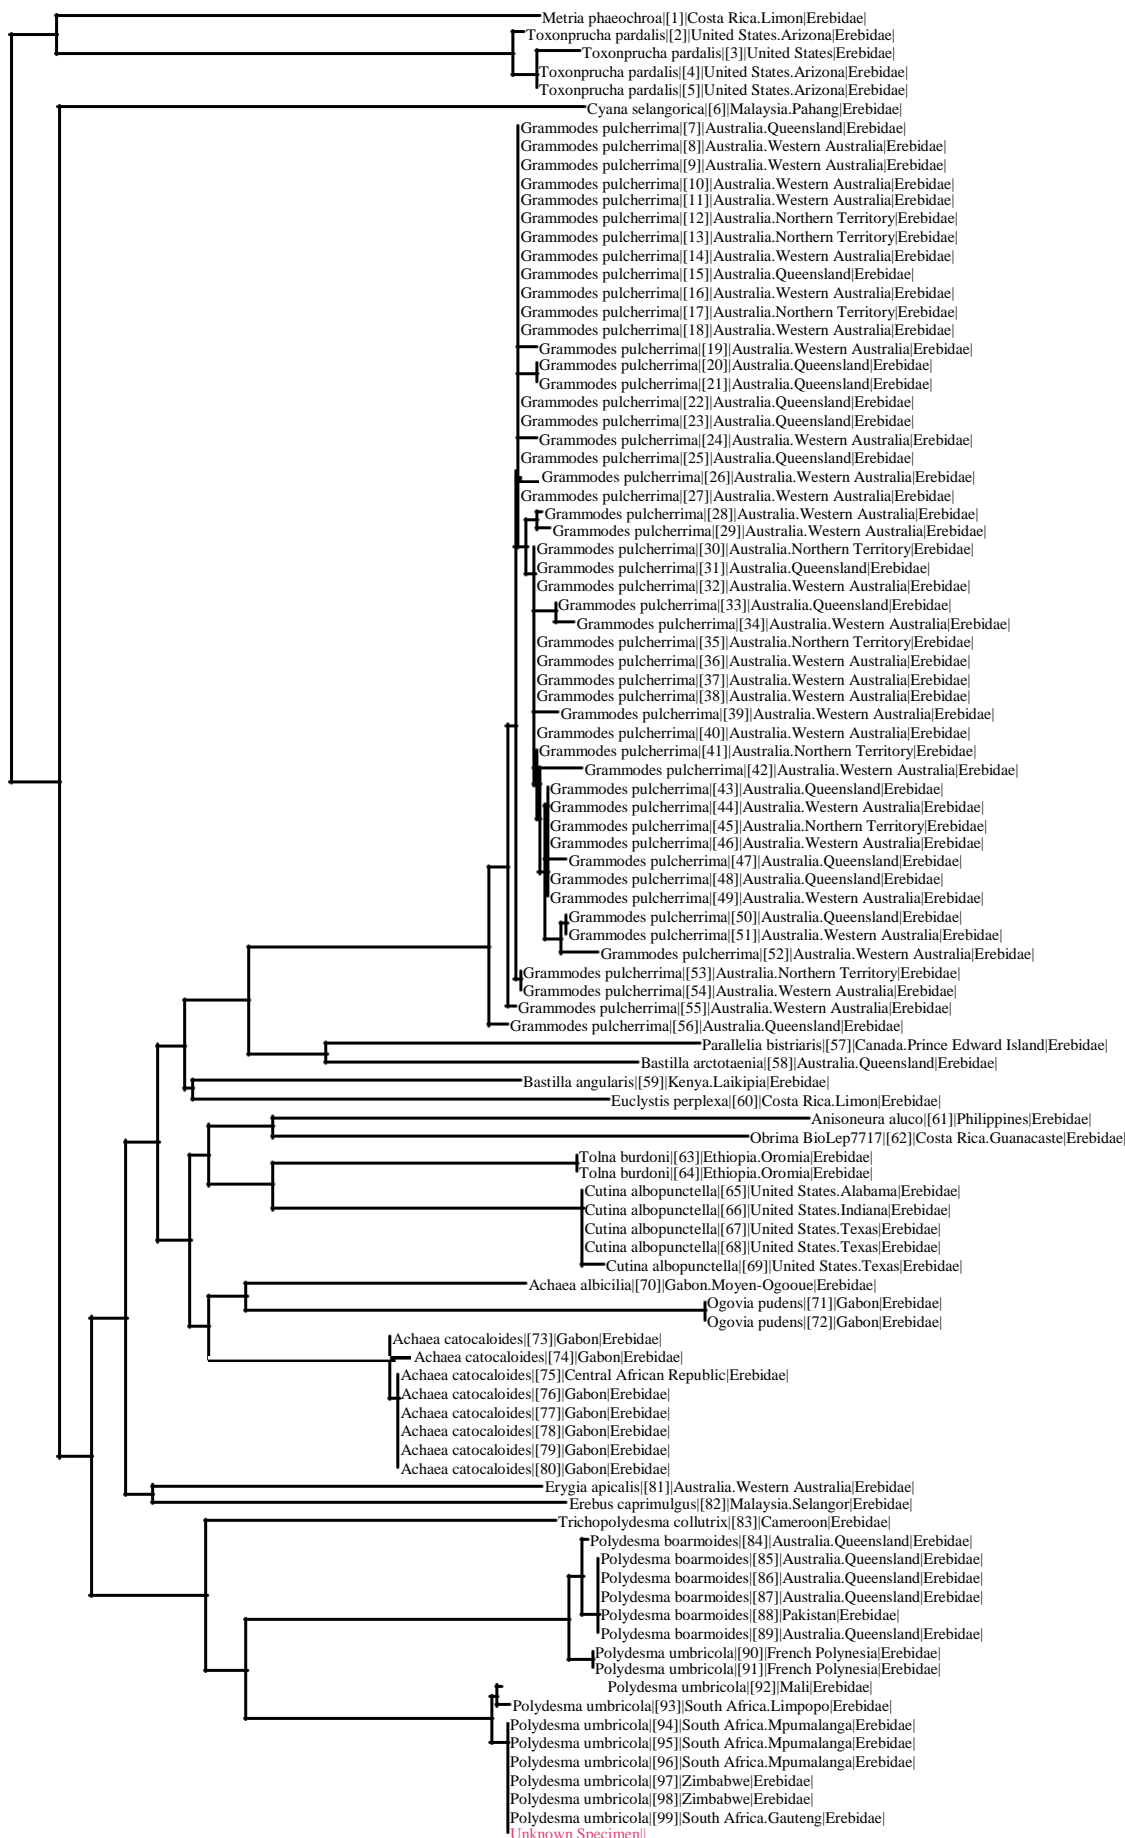

1 %

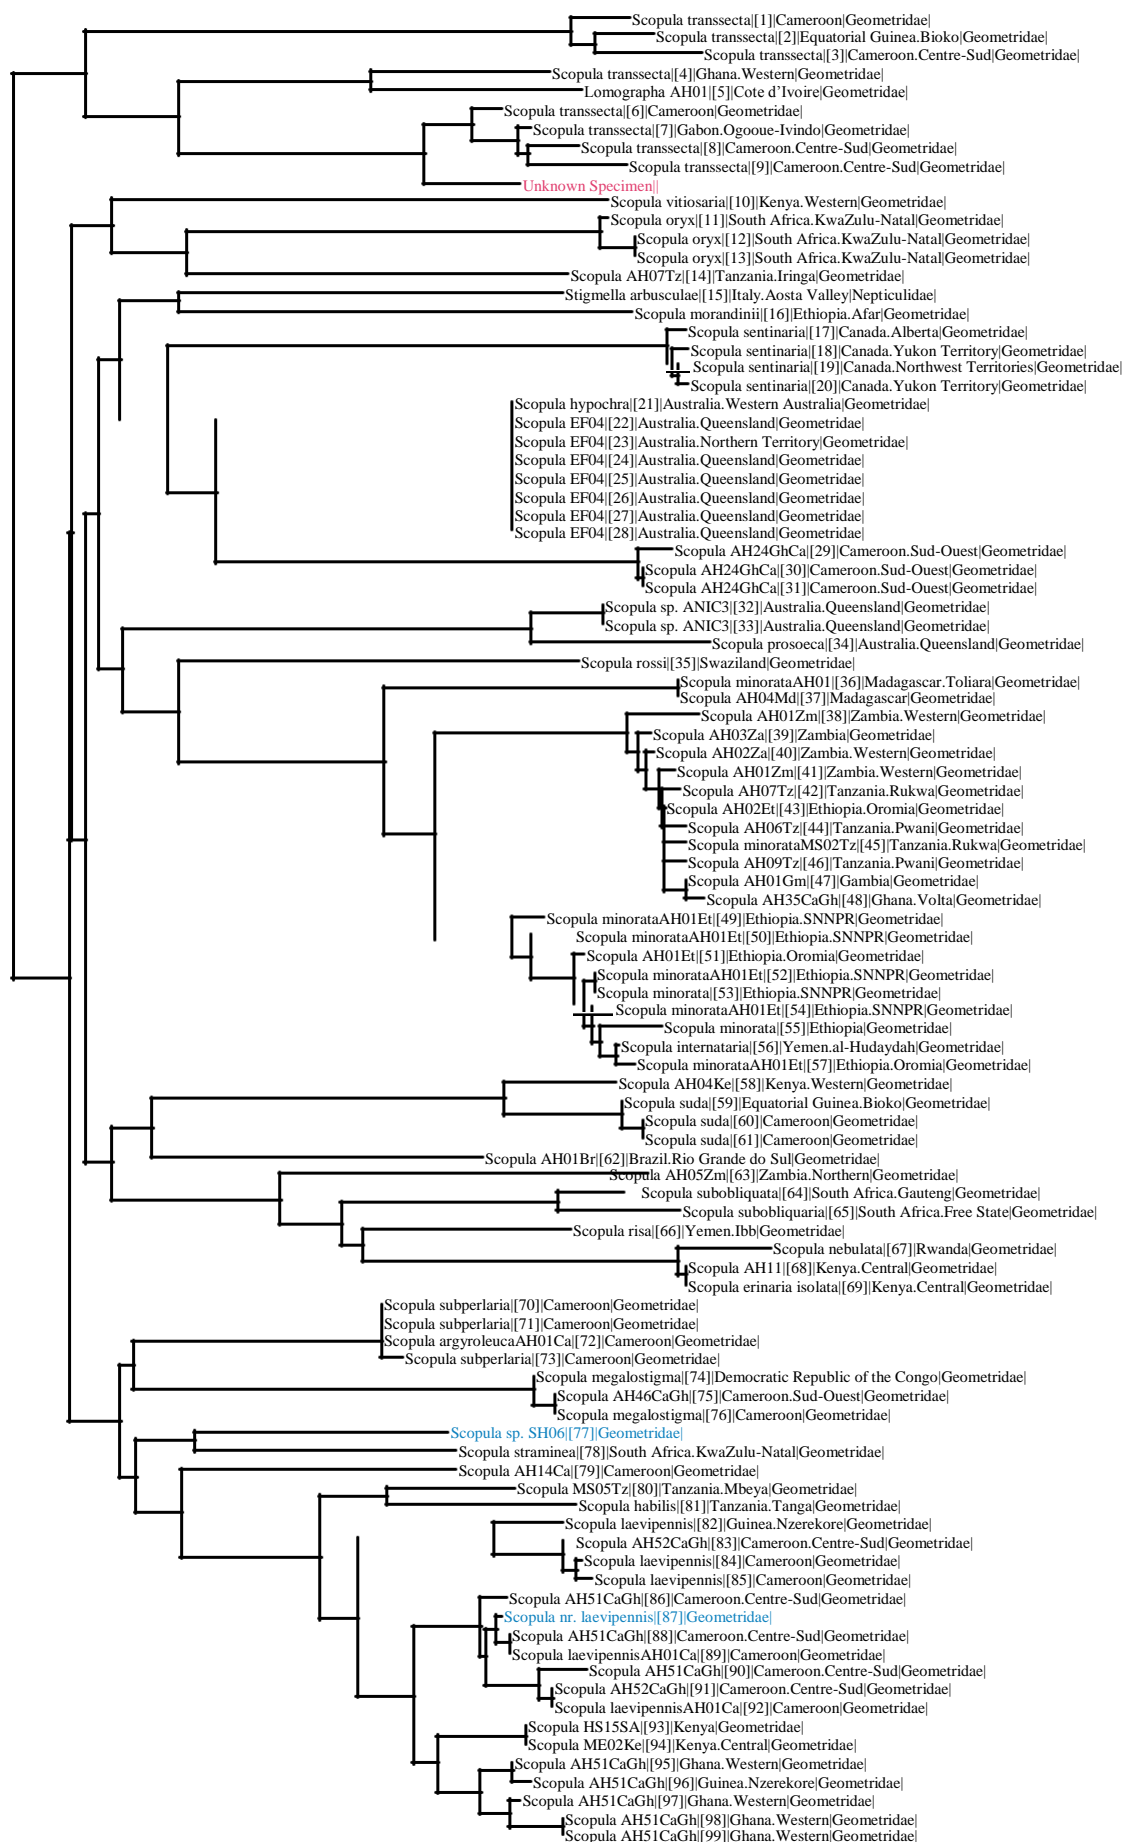

Supplement: s1 [file s1]
